# Supplementary material
Source: PubMed Central journal article supplement (PMC5365401)
Supplement: NIHMS852701-supplement-1.pdf [file NIHMS852701-supplement-1.pdf]

## SUPPLEMENTAL MATERIALS

### Supplemental Methods

#### Plasmid standard curves (Calculating the log<sub>10</sub> 16S rRNA gene copies)

1. *Calculating the total number of plasmid copies (i.e., 16S rRNA gene copies because there is one copy of this gene per plasmid) from purified plasmid DNA material utilizes the following formulae:*

$$X = \frac{m \cdot A}{p \cdot Z \cdot Y}, \text{ where:}$$

**m** = purified plasmid DNA concentration in ng/μL considering that 1 μL of the plasmid working solution is used per qPCR reaction

**A** = Avogadro's number (6.02\*10<sup>23</sup>/mole)

**p** = plasmid DNA size in base pairs (bp), which equals the plasmid insert size (3900 bp) + the 16S rRNA gene fragment length ranging between 1400-1600 bp

**Z** = the average molecular weight of a double-stranded DNA molecule, which equals 650 g/mole

**Y** = 10<sup>9</sup> to convert the value of Z from grams to nanograms, since m is in nanograms (i.e., 1 gram = 10<sup>9</sup> nanograms)

2. *Transforming X to the estimated total number of bacteria based on 16S rRNA copy number:*

$$G = \frac{X}{C}, \text{ where:}$$

**X** = total number of plasmid copies

**C** = 5, which refers to the estimated number of 16S rRNA gene copies per ASF bacterial genome or a single cell (this number can be adjusted by users to whatever value they choose; it can also be a different number for each ASF member if desired)

3. *Log<sub>10</sub> transformation to achieve the final value for the log<sub>10</sub> total 16S rRNA gene copies contained in the purified plasmid DNA:*

$$F_{x,g} = \log_{10} (G), \text{ where:}$$

**G** = estimated total log<sub>10</sub> of total gene (16S rRNA) copies (i.e., total bacterial abundance)

A real-time PCR assay for accurate quantification of the individual members of the Altered Schaedler Flora microbiota in gnotobiotic mice, Gomes-Neto et al.

Example of a calculation using the steps described above considering the following values for *Clostridium sp.* (ASF 356):

$$m = 7.63 \text{ ng}/\mu\text{L}$$

$$A = 6.02 \cdot 10^{23} / \text{mole}$$

$$p = (3900 + 1487) \text{ bp} = 5387 \text{ bp}$$

$$Z = 650 \text{ g/mole}$$

$$Y = 10^9$$

$$\mathbf{X} = \frac{7.63 \cdot 6.02 \cdot 10^{23}}{5387 \cdot 650 \cdot 10^9},$$

$$\mathbf{X} = 1.31 \cdot 10^9,$$

$$\mathbf{G} = \frac{1.31 \cdot 10^9}{5},$$

$$\mathbf{G} = 2.62 \cdot 10^8,$$

$$\mathbf{F}_{x,g} = \log_{10} (2.62 \cdot 10^8),$$

**$F_{x,g} = 8.4$  (final value used in the linear regression model to construct the qPCR standard curve)**

**Genomic DNA standard curves (Calculating the log<sub>10</sub> of total genome copies)**

**1. Derivation of DNA mass formulae:**

$$m = (n) * \left( \frac{1 \text{ mole}}{6.02 * 10^{23}} \right) * \left( \frac{650 \text{ grams}}{\text{mole}} \right),$$

$$m = (n) * \left( 1.08 * \frac{10^{-21} \text{ grams}}{\text{bp}} \right), \text{ where:}$$

**m** = genome mass

**n** = DNA size (in bp), which is the full genome length per ASF taxon (see Table S3).

**Avogadro's number** = 6.02\*10<sup>23</sup> molecules/mole

**Average molecular weight of a double-stranded DNA molecule** = 650 grams/mole

After m is calculated, its value is transformed from grams to femtograms (i.e., 1 gram = 10<sup>15</sup> femtograms) as follows:

$$m1 = (n) * \left( 1.08 * \frac{10^{-21} \text{ grams}}{\text{bp}} * 10^{15} \right),$$

$$m2 = (n) * \left( 1.08 * \frac{10^{-6} \text{ femtograms}}{\text{bp}} \right)$$

After quantification of the purified genomic DNA material extracted from 1 mL of pure culture of the ASF taxon, its concentration value (ng/μL) is then transformed to femtograms (i.e., 1 nanogram = 10<sup>6</sup> femtograms) to calculate how many genome copies are present in the extract. For that, the following calculation is performed:

$$\text{Final genome copies} = \frac{[\text{DNA ng}/\mu\text{L}] * 10^6 \text{ (transforming to femtograms)}}{m2 \text{ (as calculated above)}}$$

For example:

If a purified genomic DNA sample from 1 mL of a *Clostridium sp.* (ASF 356) pure culture gave a concentration of 2.9 ng/μL, then the formulae derived above would be applied as follows:

$$m2 = (2,900,700 \text{ bp for the full genome length}) * \left( 1.08 * \frac{10^{-6} \text{ femtograms}}{\text{bp}} \right),$$

$$m2 = 3.13 \frac{\text{femtograms}}{\text{genome}} \text{ which is the genome mass for ASF 356}$$

A real-time PCR assay for accurate quantification of the individual members of the Altered Schaedler Flora microbiota in gnotobiotic mice, Gomes-Neto et al.

$$\text{Final genome copies} = \frac{[2.9 \text{ ng}/\mu\text{L}] * 10^6 \text{ (transforming to femtograms)}}{3.13 \text{ (as calculated above)}}$$

$$\text{Final genome copies} = 9.26 * 10^5 \text{ genome copies}$$

\*Of note, the final genome copy number does not correct for the number of 16S rRNA copies for this organism (reported in this paper as 5 per ASF taxon). The plasmid and genomic DNA initial working concentrations used to construct the qPCR standard curves are shown in Table S4.

**Calculation example (Log<sub>10</sub> of total 16S rRNA gene copies [i.e., estimated bacterial abundance] for ASF 356 in cecal contents from C3H/HeN mice fed standard mouse chow)**

The calculation example below shows exactly how the Ct values generated during the qPCR assay (i.e., in duplicate) using SYBR Green Master Mix A were used to calculate the final log<sub>10</sub> of total 16S rRNA copy number (i.e., estimated total bacterial abundance) per gram of cecal sample for one C3H/HeN mouse. This calculation was similarly used for all other ASF taxa (and for samples tested with Mix B) to determine the final population abundances in fecal or cecal samples from both host genotypes and across all studies.

1. *Calculating the average of Ct values from a duplicate run using our qPCR method:*

$$Ct_x = \frac{Ct\ value\ 1 + Ct\ value\ 2}{2},\ where:$$

Ct = cycle threshold value ranging from 0 to 35

2. *Calculating the log<sub>10</sub> of total 16S rRNA copy number using the predictive equation derived from the Mix A plasmid standard curves (Table S4):*

For this example, the calculation will be based on the predictive equation generated for *L. murinus* (ASF 361):

Standard curve equation:  $Y = -3.952 * X + 45.82$ , where:

Y = average Ct value calculated in step 1 (Ct<sub>x</sub>)

X = log<sub>10</sub> of total 16S rRNA gene copies

Given the values of the Ct values 1 (16.70) and 2 (17.00) achieved for a particular sample for ASF 361, total gene copies are calculated as follows:

$$Ct_x = \frac{16.70 + 17}{2} = 16.85, \text{ then:}$$

$$16.85 = -3.952 * X + 45.82, \text{ then:}$$

$$X = 7.34 \text{ (log}_{10}\text{ of total 16S rRNA gene copies)}$$

3. *Back transforming the value achieved in step 2 from log<sub>10</sub> to exponential:*

$$\sigma = \text{POWER}(10, X), \text{ where:}$$

X = the value calculated in step 2 for the log<sub>10</sub> of total 16S rRNA gene copies

$$\sigma = \text{POWER}(10, 7.34) = 2.17 * 10^7 \text{ total 16S rRNA gene copies}$$

A real-time PCR assay for accurate quantification of the individual members of the Altered Schaedler Flora microbiota in gnotobiotic mice, Gomes-Neto et al.

4. *Calculating the total DNA amount in the eluted sample after extraction:*

$$\rho = 100 \mu\text{L} * \left[ \text{DNA} \frac{\text{ng}}{\mu\text{L}} \right], \text{ where:}$$

**Elution volume using TE buffer = 100  $\mu\text{L}$**

**[DNA ng/ $\mu\text{L}$ ] = DNA concentration (as determined using a fluorescent molecule labeling method, i.e., Quant-iT™ PicoGreen® dsDNA Broad Range Reagent)**

For this example, the values are:

$$\rho = 100 \mu\text{L} * \left[ 174 \frac{\text{ng}}{\mu\text{L}} \right], \text{ then:}$$

**$\rho = 17400 \text{ ng}$  is total amount of DNA in the extracted sample**

5. *Define the amount of DNA template used in the final qPCR reaction:*

**The amount of DNA loaded per reaction = 10 ng**

\*All samples are diluted to 10 ng/ $\mu\text{L}$  prior to running the qPCR, and then 1  $\mu\text{L}$  of the diluted sample is used in the reaction.

6. *Calculating the normalizing factor (i.e., scaling value) used to determine the final amount of 16S rRNA gene copy number in the extracted material:*

$$\tau = \frac{\rho}{10 \text{ ng}}, \text{ where:}$$

**$\rho$  = the total amount of DNA in the sample calculated in step 4**

**10 ng = the amount of DNA loaded in the qPCR reaction using 1  $\mu\text{L}$  of the diluted sample**

For the sample using the ASF 361 calculation example, the value is as follows:

$$\tau = \frac{17400}{10 \text{ ng}} = 1740$$

7. *Multiplying the value calculated in step 6 by the total number of bacteria or 16S rRNA copies calculated in step 3:*

**Total 16S rRNA copy number in the sample accounting for the DNA amount =  $\sigma * \tau$**

For this example, the calculation is:

**Total 16S rRNA copy number in the sample accounting for the DNA amount =  $2.17 * 10^7 * 1740$ , then:**

A real-time PCR assay for accurate quantification of the individual members of the Altered Schaedler Flora microbiota in gnotobiotic mice, Gomes-Neto et al.

**Total 16S rRNA copy number in the sample accounting for the DNA amount =  $3.78 * 10^{10}$**

8. *Dividing the value calculated in step 7 by the cecal content weight (i.e., wet value) in grams to get the estimated total bacteria/gram of cecal content (using the same example from above):*

$$\frac{\text{Total 16S rRNA copy number}}{\text{grams of cecal content}} = \frac{3.78 * 10^{10}}{0.224 \text{ grams}} = 1.69 * 10^{11}$$

9. *Back transforming the value calculated in step 8 from exponential to  $\log_{10}$  to achieve the final total number of  $\log_{10}$  of 16S rRNA copy number/grams of cecal content:*

$$\frac{\text{Total } \log_{10} \text{ 16S rRNA copy number}}{\text{grams of cecal content}} = \log_{10}(1.69 * 10^{11}) = 11.23$$

A real-time PCR assay for accurate quantification of the individual members of the Altered Schaedler Flora microbiota in gnotobiotic mice, Gomes-Neto et al.

**Table S1a.** Composition of the standard chow diet (LabDiet® JL Rat and Mouse/Auto 6F 5K67, LabDiet). Complete details can be found at <http://www.labdiet.com/Products/StandardDiets>.

| <b>LabDiet<br/>5K67</b>               |                    |
|---------------------------------------|--------------------|
| <b>Nutrients and Minerals</b>         | <b>% of ration</b> |
| Protein                               | 19.3               |
| Fat (ether extract)                   | 6.2                |
| Fat (acid hydrolysis)                 | 7.2                |
| Fiber (crude)                         | 4.3                |
| Nitrogen-free extract (by difference) | 53.6               |
| Ash                                   | 6.5                |
| <b>Total Digestible Nutrients, %</b>  | <b>76.3</b>        |
| <b>Metabolizable Energy, kcal/gm</b>  | <b>3.17</b>        |
| <b>Calories provided by</b>           | <b>%</b>           |
| Protein                               | 22.24              |
| Fat (ether extract)                   | 16.03              |
| Carbohydrate                          | 61.73              |



**Table S1b.** Composition of the purified experimental diets produced by Research Diets, Inc. (New Brunswick, NJ, USA). Mice were fed either a low-fat diet (LFD, D12450K) or a customized Western diet (WD, 45% kcal from fat and 17% kcal from sucrose with low maltodextrine/high starch compared to D12451). Complete diet formulations can be accessed at (<http://www.researchdiets.com/opensource-diets/stock-diets/dio-series-diets>).

|                                      | <b>Low-fat Diet (D12450K)</b> | <b>Western Diet (modified D12451)</b> |
|--------------------------------------|-------------------------------|---------------------------------------|
|                                      | <b>g (%)</b>                  | <b>g (%)</b>                          |
| Protein                              | 19.2                          | 23.7                                  |
| Carbohydrate                         | 67.3                          | 46.1                                  |
| Fat                                  | 4.3                           | 23.6                                  |
|                                      | <b>kcal (%)</b>               | <b>kcal (%)</b>                       |
| Protein                              | 20                            | 20                                    |
| Carbohydrate                         | 70                            | 34.1                                  |
| Fat                                  | 10                            | 44.9                                  |
| <b>Ingredient quantity</b>           | <b>g</b>                      | <b>g</b>                              |
| Casein, 30 Mesh                      | 200                           | 200                                   |
| L-cystine                            | 3                             | 3                                     |
| Corn Starch                          | 550                           | 137.3                                 |
| Maltodextrine 10                     | 150                           | 35.5                                  |
| Sucrose                              | 0                             | 172.8                                 |
| Cellulose BW200                      | 50                            | 50                                    |
| Soybean Oil                          | 25                            | 25                                    |
| Lard                                 | 20                            | 177.5                                 |
| Mineral Mix S10026                   | 10                            | 10                                    |
| DiCalcium Phosphate                  | 13                            | 13                                    |
| Calcium Carbonate                    | 5.5                           | 5.5                                   |
| Potassium Citrate, 1H <sub>2</sub> O | 16.5                          | 16.5                                  |
| Vitamin Mix V1001                    | 10                            | 10                                    |
| Choline Bitartrate                   | 2                             | 2                                     |
| Dyes                                 | 0.05                          | 0.05                                  |
| <b>Energy density (kcal/g)</b>       | <b>3.85</b>                   | <b>4.73</b>                           |

**Table S2.** Plasmid and genomic DNA initial working solution concentrations, as measured by fluorescent molecule labeling (see full description in Section 2.5 of the manuscript), used for the qPCR standard curves.

| <b>ASF taxa</b>                           | <b>Plasmid DNA (ng/<math>\mu</math>L)</b> | <b>Genomic DNA (ng/<math>\mu</math>L)</b> |
|-------------------------------------------|-------------------------------------------|-------------------------------------------|
| <i>Clostridium sp.</i> (ASF 356)          | 7.63                                      | 2.9                                       |
| <i>L. intestinalis</i> (ASF 360)          | 10.2                                      | 4.84                                      |
| <i>L. murinus</i> (ASF 361)               | 12.4                                      | 7.63                                      |
| <i>M. schaedleri</i> (ASF 457)            | 6.06                                      | 1.97                                      |
| <i>E. plexicaudatum</i> (ASF 492)         | 5.36                                      | 5.34                                      |
| <i>Pseudoflavonifractor sp.</i> (ASF 500) | 8.17                                      | 5.18                                      |
| <i>Clostridium sp.</i> (ASF 502)          | 10.2                                      | 3.26                                      |
| <i>P. goldsteinii</i> (ASF 519)           | 4.67                                      | 10                                        |

**Table S3.** Full genome length (bp) for all ASF taxa.

| ASF taxa                                  | Full genome length (bp)* |
|-------------------------------------------|--------------------------|
| <i>Clostridium sp.</i> (ASF 356)          | 2,900,700                |
| <i>L. intestinalis</i> (ASF 360)          | 1,868,090                |
| <i>L. murinus</i> (ASF 361)               | 2,109,070                |
| <i>M. schaedleri</i> (ASF 457)            | 2,319,180                |
| <i>E. plexicaudatum</i> (ASF 492)         | 6,104,768                |
| <i>Pseudoflavonifractor sp.</i> (ASF 500) | 3,658,722                |
| <i>Clostridium sp.</i> (ASF 502)          | 6,364,766                |
| <i>P. goldsteinii</i> (ASF 519)           | 6,862,324                |

\* **Full genome length (bp)** - full genome length for each ASF taxon that can be assessed from <http://bacteria.ensembl.org/index.html>.

**Table S4.** Standard curve parameters and limit of detection for all ASF bacteria.

| Taxon<br>ID | qPCR efficiency |       | Slope  |        | Intercept |       | R <sup>2</sup> |       | Pearson <i>r</i><br>coefficient |        | Limit of<br>detection* |         |
|-------------|-----------------|-------|--------|--------|-----------|-------|----------------|-------|---------------------------------|--------|------------------------|---------|
|             | Mix A           | Mix B | Mix A  | Mix B  | Mix A     | Mix B | Mix A          | Mix B | Mix A                           | Mix B  | Mix A                  | Mix B   |
| 356         | 0.84            | 0.69  | -3.774 | -4.379 | 41.21     | 43.51 | 0.969          | 0.991 | -0.997                          | -0.999 | 370                    | 6,900   |
| 360         | 0.87            | 0.97  | -3.693 | -3.405 | 37.97     | 32.45 | 0.986          | 0.999 | -0.997                          | -0.999 | 36                     | 8       |
| 361         | 0.79            | 0.80  | -3.952 | -3.917 | 45.84     | 39.47 | 0.924          | 0.991 | -0.994                          | -0.996 | 2,700                  | 58      |
| 457         | 0.90            | 0.57  | -3.579 | -5.131 | 37.24     | 52.01 | 0.975          | 0.990 | -0.997                          | -0.997 | 14                     | 4,900   |
| 492         | 0.78            | 0.53  | -4.011 | -5.399 | 40.99     | 51.45 | 0.977          | 0.998 | -0.999                          | -0.999 | 280                    | 130,000 |
| 500         | 0.96            | 0.86  | -3.416 | -3.696 | 34.62     | 37.02 | 0.980          | 0.942 | -0.996                          | -0.971 | 20                     | 52      |
| 502         | 0.96            | 0.80  | -3.421 | -3.925 | 34.94     | 38.17 | 0.978          | 0.991 | -0.995                          | -0.998 | 26                     | 260     |
| 519         | 0.99            | 0.58  | -3.352 | -5.064 | 35.58     | 49.86 | 0.974          | 0.987 | -0.997                          | -0.996 | 10                     | 3,000   |

\*Limit of detection expressed as total number of bacterial cells estimated from each ASF species-specific standard curve using purified plasmid DNA and adjusted for 16 rRNA gene copy number considering five copies of the 16 rRNA gene for each ASF taxon.

## Supplemental Figures

**Fig. S1.** CLUSTAL W multiple sequence alignment of all ASF 16S rRNA gene sequences that can be assessed in the NCBI database. Regions highlighted in gray represent the primer sequences from Sarma-Rupavtarm et al., 2004, while bold nucleotides represent the newly developed primer sets herein presented. Overlapping sequences between the two primer sets appear italicized. Asterisks highlight positions with high nucleotide sequence similarity. Note that the newly developed primers are located between the hypervariable regions 1-3 of the 16S rRNA gene and uniquely positioned in regions of low nucleotide similarities across all sequences. Alignment was produced using the Bioedit software version 7.1.7 (Bioeditor Sequence Alignment Editor, Tom Hall, Ibis Biosciences, Carlsbad, CA).

|                                                                                                                                                                                                                                                                                                                                                                                                                                                                                                                                                                                                       |  |         |  |    |    |            |     |            |  |            |
|-------------------------------------------------------------------------------------------------------------------------------------------------------------------------------------------------------------------------------------------------------------------------------------------------------------------------------------------------------------------------------------------------------------------------------------------------------------------------------------------------------------------------------------------------------------------------------------------------------|--|---------|--|----|----|------------|-----|------------|--|------------|
|                                                                                                                                                                                                                                                                                                                                                                                                                                                                                                                                                                                                       |  |         |  |    | 5  |            | 55  |            |  |            |
| gi                                                                                                                                                                                                                                                                                                                                                                                                                                                                                                                                                                                                    |  | 5163477 |  | gb |    | AF157056.1 |     | <b>ASF</b> |  | <b>519</b> |
| gi                                                                                                                                                                                                                                                                                                                                                                                                                                                                                                                                                                                                    |  | 5163471 |  | gb |    | AF157050.1 |     | <b>ASF</b> |  | <b>360</b> |
| gi                                                                                                                                                                                                                                                                                                                                                                                                                                                                                                                                                                                                    |  | 5163470 |  | gb |    | AF157049.1 |     | <b>ASF</b> |  | <b>361</b> |
| gi                                                                                                                                                                                                                                                                                                                                                                                                                                                                                                                                                                                                    |  | 5163476 |  | gb |    | AF157055.1 |     | <b>ASF</b> |  | <b>457</b> |
| gi                                                                                                                                                                                                                                                                                                                                                                                                                                                                                                                                                                                                    |  | 5163473 |  | gb |    | AF157052.1 |     | <b>ASF</b> |  | <b>356</b> |
| gi                                                                                                                                                                                                                                                                                                                                                                                                                                                                                                                                                                                                    |  | 5163472 |  | gb |    | AF157051.1 |     | <b>ASF</b> |  | <b>500</b> |
| gi                                                                                                                                                                                                                                                                                                                                                                                                                                                                                                                                                                                                    |  | 5163475 |  | gb |    | AF157054.1 |     | <b>ASF</b> |  | <b>492</b> |
| gi                                                                                                                                                                                                                                                                                                                                                                                                                                                                                                                                                                                                    |  | 5163474 |  | gb |    | AF157053.1 |     | <b>ASF</b> |  | <b>502</b> |
| <pre> GGCTCAGGATGAACGCTAGCGACAGGCTTAACACATGCAAGTCGAGGGG<b>CGACCGATGT</b> GGCTCAGGACGAACGCTGGCGGCGTGCCTAATACATGCAAGTCGAGCGAGCTGAACCAGC GGCTCAGGATGAACGCTGGCGGCGTGCCTAATACATGCAAGTC<b>GAACGAAACTTCTTTAT</b> GGCTCAGAACGAACGCTGGCGGCGTGCCTAACACATGCAAGTCAGGGAGAAAGT<b>CTCTTC</b> GGCTCAGGATGAACGCTGGCGGCGTGCCTAACACATGCAAGTCGAGCG<b>AAAATAATTAGG</b> GGCTCAGGATGAACGCTGGCGGCGTGCCTAACACATGCAAGTC<b>GAACGGAGGACCCCTGA</b> GGCTCAGGATGAACGCTGGCGGCGTGCCTAACACATGCAAGTCGAACGAAGCAYAT<b>CTGC</b> GGCTCAGGATGAACGCTGGCGGCGTGCCTAACACATGCAAGTC<b>GAGCGAAGCACTTTTTT</b> ***** * ***** *** * ** *** ***** </pre> |  |         |  |    |    |            |     |            |  |            |
|                                                                                                                                                                                                                                                                                                                                                                                                                                                                                                                                                                                                       |  |         |  |    | 65 |            | 115 |            |  |            |
| gi                                                                                                                                                                                                                                                                                                                                                                                                                                                                                                                                                                                                    |  | 5163477 |  | gb |    | AF157056.1 |     | <b>ASF</b> |  | <b>519</b> |
| gi                                                                                                                                                                                                                                                                                                                                                                                                                                                                                                                                                                                                    |  | 5163471 |  | gb |    | AF157050.1 |     | <b>ASF</b> |  | <b>360</b> |
| gi                                                                                                                                                                                                                                                                                                                                                                                                                                                                                                                                                                                                    |  | 5163470 |  | gb |    | AF157049.1 |     | <b>ASF</b> |  | <b>361</b> |
| gi                                                                                                                                                                                                                                                                                                                                                                                                                                                                                                                                                                                                    |  | 5163476 |  | gb |    | AF157055.1 |     | <b>ASF</b> |  | <b>457</b> |
| gi                                                                                                                                                                                                                                                                                                                                                                                                                                                                                                                                                                                                    |  | 5163473 |  | gb |    | AF157052.1 |     | <b>ASF</b> |  | <b>356</b> |
| gi                                                                                                                                                                                                                                                                                                                                                                                                                                                                                                                                                                                                    |  | 5163472 |  | gb |    | AF157051.1 |     | <b>ASF</b> |  | <b>500</b> |
| gi                                                                                                                                                                                                                                                                                                                                                                                                                                                                                                                                                                                                    |  | 5163475 |  | gb |    | AF157054.1 |     | <b>ASF</b> |  | <b>492</b> |
| gi                                                                                                                                                                                                                                                                                                                                                                                                                                                                                                                                                                                                    |  | 5163474 |  | gb |    | AF157053.1 |     | <b>ASF</b> |  | <b>502</b> |
| <pre> <b>AGCAA</b>-----<b>TACAT</b>TGGTGGCGACCGGCGCACGGGTGAGTAACGCGTAT A-GATTC<b>ACTTCGGTGATGACGCTGGGAAC</b>GCGAGCGGCGGATGGGTGAGTAACACGTGG <b>CACCG</b>AGTGCTTGCACTCACCGATAAAGAGTTGAGTGGCGAACGGGTGAGTAACACGTGG <b>GGGGA</b>-----<b>TGATTAAC</b>CGGCGCACGGGTGAGTAACACGTGA <b>AGCTTG</b>-----<b>CTTTTA</b>ATTATTTTAGCGGCGGACGGGTGAGTAACGTGTGG <b>AGGAG</b>TTTTTCGGA--CAACTGAAGGGAATCCTTAGTGGCGGACGGGTGAGTAACGCGTGA <b>GGAATTCCTTCGGGGAGGAAG</b>CRGTTATGACTGAGTGGCGGACGGGTGAGTAACGCGTGG <b>AGAAC</b>TCTTCGGA--GGGAAGAGAGGGTGACTTAGCGGCGGACGGGTGAGTAACGCGTGG * **** * ***** ** </pre>                     |  |         |  |    |    |            |     |            |  |            |

|                                                          |     |                                                                                        |     |
|----------------------------------------------------------|-----|----------------------------------------------------------------------------------------|-----|
| gi   5163477   gb   AF157056.1   <b>ASF</b>   <b>519</b> | 125 | GCAACCTACCTATCAGAGGGGAATAACCCGGCGAAAGTCGGACTAATACCGCATAAAACA                           | 175 |
| gi   5163471   gb   AF157050.1   <b>ASF</b>   <b>360</b> |     | GTAACCTGCCCTAAAGTCTGGGATACCACTTGGAAACAGGTGCTAATACCGGATAACAAC                           |     |
| gi   5163470   gb   AF157049.1   <b>ASF</b>   <b>361</b> |     | GCAACCTGCCCAAAGAGGGGGATAACACTTGGAAACAGGTGCTAATACCGCATAACCAT                            |     |
| gi   5163476   gb   AF157055.1   <b>ASF</b>   <b>457</b> |     | GTGACCTGCCTTTTAGACTGGAACAACCTTACCGAAAGGTGAGCTAATGCCGGATGAGTTA                          |     |
| gi   5163473   gb   AF157052.1   <b>ASF</b>   <b>356</b> |     | GCAACCTGCCTTTTACTGTGGAATAATCACTGGAAACGGTGACTAATACCGCATAAC <b>GTTT</b>                  |     |
| gi   5163472   gb   AF157051.1   <b>ASF</b>   <b>500</b> |     | GTAACCTGCCTTGGAGTGGGGGAATAACAGCTGGAAACAGCTGCTAATACCGCATGATATG                          |     |
| gi   5163475   gb   AF157054.1   <b>ASF</b>   <b>492</b> |     | GCAACCTGCCCCATAACCGGGGGACAACAGCCGGAAACGGCTGCTAATACCGCATAAC <b>GTTT</b>                 |     |
| gi   5163474   gb   AF157053.1   <b>ASF</b>   <b>502</b> |     | GCAACCTGCCTTACACAGGGGGATAACAATTAGAAATGATTGCTAATACCGCATAAGACC                           |     |
|                                                          |     | * * * * *                                                                              |     |
|                                                          | 185 | GGG <b>GTTCCACATGGA</b> ----- <b>AATATTTGTTAA</b> AGAATTATCGCTGATAGATGGGCATGC          | 235 |
| gi   5163477   gb   AF157056.1   <b>ASF</b>   <b>519</b> |     | <b>AATAGCTGCATGGCTATTGCTT</b> AAAAGGCGGCGAAAGCTGTCTGCTAAAGGATGGACCCGC                  |     |
| gi   5163471   gb   AF157050.1   <b>ASF</b>   <b>360</b> |     | AGTTACCGCATGGTAACTAT <b>GTAAAAGGT</b> - <b>GGCTATGCT</b> ACCGCTTTTGGATGGGCCCGC         |     |
| gi   5163470   gb   AF157049.1   <b>ASF</b>   <b>361</b> |     | TATAA <b>GTGCATGTTTATATAGGAAAAGTT</b> GGGGAGACCTGACGCTGAAAGATGGACTCGC                  |     |
| gi   5163476   gb   AF157055.1   <b>ASF</b>   <b>457</b> |     | <b>CTTAGGAGGCATCTT</b> ----- <b>CTAAGAAAGAAAGGATTTATTC</b> GGTAAAAGATGGGCCCGC          |     |
| gi   5163473   gb   AF157052.1   <b>ASF</b>   <b>356</b> |     | TCTGTGTCTCGCATGGC----- <b>ACTGGAC</b> - <b>ATCAAAGATTTATCGCT</b> CTGAGATGGACTCGC       |     |
| gi   5163472   gb   AF157051.1   <b>ASF</b>   <b>500</b> |     | <b>TTAAAACCGCATGGT</b> ----- <b>TTTAAA</b> -- <b>AAGAAA</b> ACTCCGGTGGTATGGGATGGGCCCGC |     |
| gi   5163475   gb   AF157054.1   <b>ASF</b>   <b>492</b> |     | CCGGTACCGCATGGT----- <b>ACAGAG</b> -- <b>GTAAA</b> ACT <b>GAGGTGGTGTAA</b> GTGGGCCCGC  |     |
| gi   5163474   gb   AF157053.1   <b>ASF</b>   <b>502</b> |     | * * * * *                                                                              |     |
|                                                          | 245 | GTTCCATTAGATAGTTGGT <b>GAGGTAACGGCTCACCAAGTCCACGATGGATAGGGGTTCTG</b>                   | 295 |
| gi   5163477   gb   AF157056.1   <b>ASF</b>   <b>519</b> |     | GGTGCATTAGCTAGTTGGT <b>AAGGTAATGGCTTACCAAGGCGACGATGCATAGCCGAGTTG</b>                   |     |
| gi   5163471   gb   AF157050.1   <b>ASF</b>   <b>360</b> |     | GGCGCATTAGCTAGTTGGTGGGGTAAAGGCTTACCAAGGCAATGATGCGTAGCCGA <b>ACTG</b>                   |     |
| gi   5163470   gb   AF157049.1   <b>ASF</b>   <b>361</b> |     | <b>GTCCCATTAGCTAGTTGGT</b> AGGGTAAATGGCCTACCAAGGCGACGATGGGTAGCCGGCCTG                  |     |
| gi   5163476   gb   AF157055.1   <b>ASF</b>   <b>457</b> |     | ATCTGATTAGCTAGTTGGT <b>GAGATAATAGCCACCAAGGCAACGATCAGTAGCCGACCTG</b>                    |     |
| gi   5163473   gb   AF157052.1   <b>ASF</b>   <b>356</b> |     | GTCTGATTAGCTAGTTGGCGGGGTAAACGGCC <b>ACCAAGGCGACGATCAGTAGCCGGACTG</b>                   |     |
| gi   5163472   gb   AF157051.1   <b>ASF</b>   <b>500</b> |     | GTCTGATTAGCTGGTTGGYGGGGTAAACGGCC <b>ACCAAGGCGACGATCAGTAGCCGGCCTG</b>                   |     |
| gi   5163475   gb   AF157054.1   <b>ASF</b>   <b>492</b> |     | GTCTGATTAGGTAGTTGGTGGGGT <b>AGAAGCCTACCAAGCCGACGATCAGTAGCCGACCTG</b>                   |     |
| gi   5163474   gb   AF157053.1   <b>ASF</b>   <b>502</b> |     | * * * * *                                                                              |     |
|                                                          | 305 | AGAGGAAGGTCCCCCACACTGGTACTGAGACACGGACCAGACTCCTACGGGAGGCAGCAG                           | 355 |
| gi   5163477   gb   AF157056.1   <b>ASF</b>   <b>519</b> |     | AGAGACTGATCGGCCACATTGGGACTGAGACACGGCCAAACTCCTACGGGAGGCAGCAG                            |     |
| gi   5163471   gb   AF157050.1   <b>ASF</b>   <b>360</b> |     | AGAGGTTGATCGGCCACATTGGGACTGAGACACGGCCAAACTCCTACGGGAGGCAGCAG                            |     |
| gi   5163470   gb   AF157049.1   <b>ASF</b>   <b>361</b> |     | AGAGGGTGGCCGGCCACACTGGGACTGAGACACGGCCAGACTCCTACGGGAGGCAGCAG                            |     |
| gi   5163476   gb   AF157055.1   <b>ASF</b>   <b>457</b> |     | AGAGGGT <b>GACCGGCCACATTGGGACTGAGACACGGCCAAACTCCTACGGGAGGCAGCAG</b>                    |     |
| gi   5163473   gb   AF157052.1   <b>ASF</b>   <b>356</b> |     | AGAGGTTGGCCGGCCACATTGGGACTGAGACACGGCCAGACTCCTACGGGAGGCAGCAG                            |     |
| gi   5163472   gb   AF157051.1   <b>ASF</b>   <b>500</b> |     | AGAGGGCGGGCCGGCCACATTGGGACTGAGACACGGCCAGACTCCTACGGGAGGCAGCAG                           |     |
| gi   5163475   gb   AF157054.1   <b>ASF</b>   <b>492</b> |     | AGAGGGCGGGCCGGCCACATTGGGACTGAGACACGGCCAGACTCCTACGGGAGGCAGCAG                           |     |
| gi   5163474   gb   AF157053.1   <b>ASF</b>   <b>502</b> |     | AGAGGGCGGGCCGGCCACATTGGGACTGAGACACGGCCAAACTCCTACGGGAGGCAGCAG                           |     |
|                                                          |     | **** * * * * *                                                                         |     |



|    |  |         |  |    |     |            |     |            |     |                                                                                                                                                       |  |     |
|----|--|---------|--|----|-----|------------|-----|------------|-----|-------------------------------------------------------------------------------------------------------------------------------------------------------|--|-----|
|    |  |         |  |    | 605 |            | 655 |            |     |                                                                                                                                                       |  |     |
| gi |  | 5163477 |  | gb |     | AF157056.1 |     | <b>ASF</b> | 519 | TCAGCGGTGAAAGTTTGTGGCTCAACCATAAAATTGCCGTTGAAACTGGTTGACTTGAGT                                                                                          |  |     |
| gi |  | 5163471 |  | gb |     | AF157050.1 |     | <b>ASF</b> | 360 | TCTGATGTGAAAGCCCCGGCTTAACCGAGGAATTGCATCGGAACTGTGTTTCTTGAGT                                                                                            |  |     |
| gi |  | 5163470 |  | gb |     | AF157049.1 |     | <b>ASF</b> | 361 | TCTGATGTGAAAGCCTTCGGCTTAACCGGAGTAGTGCATTGGAACTGGGAGACTTGAGT                                                                                           |  |     |
| gi |  | 5163476 |  | gb |     | AF157055.1 |     | <b>ASF</b> | 457 | TCATTAGTCAAAGACTAGAGCTCAACTTTAGTAAGGCTAGTGATACTATAACTAGAGT                                                                                            |  |     |
| gi |  | 5163473 |  | gb |     | AF157052.1 |     | <b>ASF</b> | 356 | CGATATGTGAAAGCCTTAAGCTTAACTTAAGGATAGCATAACGAACTATCTAGCTAGAGT                                                                                          |  |     |
| gi |  | 5163472 |  | gb |     | AF157051.1 |     | <b>ASF</b> | 500 | TCAGATGTGAAAACCCAGGGCTCAACCTGTGGCCTGCATTTGAAACTGTAGTTCTTGAGT                                                                                          |  |     |
| gi |  | 5163475 |  | gb |     | AF157054.1 |     | <b>ASF</b> | 492 | TCTGATGTGAAAGCCCCGGGCTCAACCCCGGGACTGCATTGGAAACTGCCGGCTGGAGT                                                                                           |  |     |
| gi |  | 5163474 |  | gb |     | AF157053.1 |     | <b>ASF</b> | 502 | TCTGATGTGAAAATCCGGGGCCCAACCCCGGAATTGCATTGGAAACTGCATATCTAGAGT                                                                                          |  |     |
|    |  |         |  |    |     |            |     |            |     | ** ** *                      ** ** *                      **                      ***                      ** ** *                                    |  |     |
|    |  |         |  |    |     |            |     |            |     | 665                                                                                                                                                   |  | 715 |
| gi |  | 5163477 |  | gb |     | AF157056.1 |     | <b>ASF</b> | 519 | ATATTTGAGGTAGGCGGAATGCGTGGTGTAGCGGTGAAATGCATAGATATCACGCAGAAC                                                                                          |  |     |
| gi |  | 5163471 |  | gb |     | AF157050.1 |     | <b>ASF</b> | 360 | GCAGAAGAGGAGAGTGGAACCTCCATGTGTAGCGGTGGAATGCGTAGATATATGGAAGAAC                                                                                         |  |     |
| gi |  | 5163470 |  | gb |     | AF157049.1 |     | <b>ASF</b> | 361 | GCAGAAGAGGAGAGTGGAACCTCCATGTGTAGCGGTGAAATGCGTAGATATATGGAAGAAC                                                                                         |  |     |
| gi |  | 5163476 |  | gb |     | AF157055.1 |     | <b>ASF</b> | 457 | ATCAGAGAGGATTGCAGAATTCCTGGTGTAGCGGTGAAATGCGTAGATATCAGGAGGAAT                                                                                          |  |     |
| gi |  | 5163473 |  | gb |     | AF157052.1 |     | <b>ASF</b> | 356 | ACAGGAGAGGAAAGCGGAATTCCTAGTGTAGCGGTGAAATGCGTAGATATTAGGAAGAAC                                                                                          |  |     |
| gi |  | 5163472 |  | gb |     | AF157051.1 |     | <b>ASF</b> | 500 | ACTGGAGAGGCAGACGGAATTCCTAGTGTAGCGGTGAAATGCGTAGATATTAGGAGGAAC                                                                                          |  |     |
| gi |  | 5163475 |  | gb |     | AF157054.1 |     | <b>ASF</b> | 492 | GTCGGAGGGGTAAGCGGAATTCCTAGTGTAGCGGTGAAATGCGTAGATATTAGGAGGAAC                                                                                          |  |     |
| gi |  | 5163474 |  | gb |     | AF157053.1 |     | <b>ASF</b> | 502 | GTCGGAGAGGCAAGTGAATTCCTGGTGTAGCGGTGAAATGCGTAGATATCAGGAGGAAC                                                                                           |  |     |
|    |  |         |  |    |     |            |     |            |     | * **                      *** *                      *****                      *****                      * ** *                                     |  |     |
|    |  |         |  |    |     |            |     |            |     | 725                                                                                                                                                   |  | 775 |
| gi |  | 5163477 |  | gb |     | AF157056.1 |     | <b>ASF</b> | 519 | TCCGATTGCGAAGGCAGCTTACTAAACTATAACTGACACTGAAGCACGAAAGCGTGGGGA                                                                                          |  |     |
| gi |  | 5163471 |  | gb |     | AF157050.1 |     | <b>ASF</b> | 360 | ACCAGTGGCGAAGGCGGCTCTCTGGTCTGTAAGTACGCTGAGGCTCGAAAGCATGGGTA                                                                                           |  |     |
| gi |  | 5163470 |  | gb |     | AF157049.1 |     | <b>ASF</b> | 361 | ACCAGTGGCGAAGGCGGCTCTCTGGTCTGTAAGTACGCTGAGGTTGCGAAAGCGTGGGTA                                                                                          |  |     |
| gi |  | 5163476 |  | gb |     | AF157055.1 |     | <b>ASF</b> | 457 | ACCGTTAGCGAAGGCGGCAATCTGGCTGGAAACTGACGCTGAGGTGCGAAAGCGTGGGTA                                                                                          |  |     |
| gi |  | 5163473 |  | gb |     | AF157052.1 |     | <b>ASF</b> | 356 | ACCAGTGGCGAAGGCGGCTTTCTGGACTGAAACTGACGCTGAGGCTCGAAAGCGTGGGGA                                                                                          |  |     |
| gi |  | 5163472 |  | gb |     | AF157051.1 |     | <b>ASF</b> | 500 | ACCAGTGGCGAAGGCGGCTCTGCTGGACAGCAACTGACGCTGAGGCGCGAAAGCGTGGGGA                                                                                         |  |     |
| gi |  | 5163475 |  | gb |     | AF157054.1 |     | <b>ASF</b> | 492 | ACCAGTGGCGAAGGCGGCTTACTGGACGATCACTGACGCTGAGGCTCGAAAGCGTGGGGA                                                                                          |  |     |
| gi |  | 5163474 |  | gb |     | AF157053.1 |     | <b>ASF</b> | 502 | ACCAGTGGCGAAGGCGGCTTGCTGGACGATGACTGACGTTGAGGCTCGAAAGCGTGGGGA                                                                                          |  |     |
|    |  |         |  |    |     |            |     |            |     | ** * ***** ** *                      **                      *****                      *** *                      *****                      ***** * |  |     |
|    |  |         |  |    |     |            |     |            |     | 785                                                                                                                                                   |  | 835 |
| gi |  | 5163477 |  | gb |     | AF157056.1 |     | <b>ASF</b> | 519 | TCAAACAGGATTAGATACCCTGGTAGTCCACGCAGTAAACGATGATTACTAGCTGTTTGG                                                                                          |  |     |
| gi |  | 5163471 |  | gb |     | AF157050.1 |     | <b>ASF</b> | 360 | GCGAACAGGATTAGATACCCTGGTAGTCCATGCCGTAAACGATGAGTGCTAAGTGTTGGG                                                                                          |  |     |
| gi |  | 5163470 |  | gb |     | AF157049.1 |     | <b>ASF</b> | 361 | GCAAACAGGATTAGATACCCTGGTAGTCCACGCCGTAAACGATGAATGCTAAGTGTTGGG                                                                                          |  |     |
| gi |  | 5163476 |  | gb |     | AF157055.1 |     | <b>ASF</b> | 457 | GCAAACAGGATTAGATACCCTGGTAGTCCACGCTGTAAACGATGGATGCTAGGTGTTGGG                                                                                          |  |     |
| gi |  | 5163473 |  | gb |     | AF157052.1 |     | <b>ASF</b> | 356 | GCGAACAGGATTAGATACCCTGGTAGTCCACGCTGTAAACGATGAGTGCTAGGTGTCGGG                                                                                          |  |     |
| gi |  | 5163472 |  | gb |     | AF157051.1 |     | <b>ASF</b> | 500 | GCAAACAGGATTAGATACCCTGGTAGTCCACGCTGTAAACGATGGATACTAGGTGTCGGG                                                                                          |  |     |
| gi |  | 5163475 |  | gb |     | AF157054.1 |     | <b>ASF</b> | 492 | GCAAACAGGATTAGATACCCTGGTAGTCCACGCCGTAAACGATGAATACTAGGTGTCGGC                                                                                          |  |     |
| gi |  | 5163474 |  | gb |     | AF157053.1 |     | <b>ASF</b> | 502 | GCAAACAGGATTAGATACCCTGGTAGTCCACGCCGTAAACGATGACTACTAGGTGTCGGG                                                                                          |  |     |
|    |  |         |  |    |     |            |     |            |     | * *****                      **                      *****                      * ** *                      ** *                                      |  |     |



|    |  |         |  |    |     |                                                               |                                                              |            |      |            |  |
|----|--|---------|--|----|-----|---------------------------------------------------------------|--------------------------------------------------------------|------------|------|------------|--|
|    |  |         |  |    | 845 |                                                               | 895                                                          |            |      |            |  |
| gi |  | 5163477 |  | gb |     | AF157056.1                                                    |                                                              | <b>ASF</b> |      | <b>519</b> |  |
| gi |  | 5163471 |  | gb |     | AF157050.1                                                    |                                                              | <b>ASF</b> |      | <b>360</b> |  |
| gi |  | 5163470 |  | gb |     | AF157049.1                                                    |                                                              | <b>ASF</b> |      | <b>361</b> |  |
| gi |  | 5163476 |  | gb |     | AF157055.1                                                    |                                                              | <b>ASF</b> |      | <b>457</b> |  |
| gi |  | 5163473 |  | gb |     | AF157052.1                                                    |                                                              | <b>ASF</b> |      | <b>356</b> |  |
| gi |  | 5163472 |  | gb |     | AF157051.1                                                    |                                                              | <b>ASF</b> |      | <b>500</b> |  |
| gi |  | 5163475 |  | gb |     | AF157054.1                                                    |                                                              | <b>ASF</b> |      | <b>492</b> |  |
| gi |  | 5163474 |  | gb |     | AF157053.1                                                    |                                                              | <b>ASF</b> |      | <b>502</b> |  |
|    |  |         |  |    |     | GATAC----                                                     | <b>ACAGTAAGCGGCACAGCGAAAGCGTTAAGTAATCCACCTGGGGAGTACGCC</b>   |            |      |            |  |
|    |  |         |  |    |     | AGGTTTCCGCCTCTCAGTGCTGCAGCTAACGCATTAAGCACTCCGCCTGGGGAGTACGAC  |                                                              |            |      |            |  |
|    |  |         |  |    |     | GGGTTTCCGCCCTTCAGTGCTGCAGCTAACGCAATAAGCATTCCGCCTGGGGAGTACGAC  |                                                              |            |      |            |  |
|    |  |         |  |    |     | CTTT-TAA---GTTT                                               | <b>CAGTGCCGAGCAAACGCGATAAGCATCCCGCTGGGGAGTACGTT</b>          |            |      |            |  |
|    |  |         |  |    |     | GAGG-AAT---TCCC                                               | <b>GGTGCCGAGCAAACGCAATAAGCACTCCACCTGGGGAGTACGAC</b>          |            |      |            |  |
|    |  |         |  |    |     | GGAC-TGACCC                                                   | <b>CTCCGTGCCGAGTTAACACAATAAGTATCCACCTGGGGAGTACGAT</b>        |            |      |            |  |
|    |  |         |  |    |     | GGGC-AGAGY                                                    | <b>CCCGCTGCCGAGCAAACGCAATAAGTATCCCGCTGGGGAGTACGTT</b>        |            |      |            |  |
|    |  |         |  |    |     | AGGC-AAAGC                                                    | <b>CTTTCCGTGCCGAGCAAACGCAATAAGTAGTCCACCTGGGGAGTACGTT</b>     |            |      |            |  |
|    |  |         |  |    |     |                                                               | * *    ** ** *    ***** *    ** *****                        |            |      |            |  |
|    |  |         |  |    |     | 905                                                           |                                                              | 955        |      |            |  |
| gi |  | 5163477 |  | gb |     | AF157056.1                                                    |                                                              | <b>ASF</b> |      | <b>519</b> |  |
| gi |  | 5163471 |  | gb |     | AF157050.1                                                    |                                                              | <b>ASF</b> |      | <b>360</b> |  |
| gi |  | 5163470 |  | gb |     | AF157049.1                                                    |                                                              | <b>ASF</b> |      | <b>361</b> |  |
| gi |  | 5163476 |  | gb |     | AF157055.1                                                    |                                                              | <b>ASF</b> |      | <b>457</b> |  |
| gi |  | 5163473 |  | gb |     | AF157052.1                                                    |                                                              | <b>ASF</b> |      | <b>356</b> |  |
| gi |  | 5163472 |  | gb |     | AF157051.1                                                    |                                                              | <b>ASF</b> |      | <b>500</b> |  |
| gi |  | 5163475 |  | gb |     | AF157054.1                                                    |                                                              | <b>ASF</b> |      | <b>492</b> |  |
| gi |  | 5163474 |  | gb |     | AF157053.1                                                    |                                                              | <b>ASF</b> |      | <b>502</b> |  |
|    |  |         |  |    |     | GGCAACGGT                                                     | <b>GAAACTCAAAGGAATTGACGGGGGGCCCGCACAAAGCGGAGGAACATGTGGTT</b> |            |      |            |  |
|    |  |         |  |    |     | CGCAAGGTT                                                     | <b>GAAACTCAAAGGAATTGACGGGGGGCCCGCACAAAGCGGTGGAGCATGTGGTT</b> |            |      |            |  |
|    |  |         |  |    |     | CGCAAGGTT                                                     | <b>GAAACTCAAAGGAATTGACGGGGGGCCCGCACAAAGCGGTGGAGCATGTGGTT</b> |            |      |            |  |
|    |  |         |  |    |     | TGCAAGAAT                                                     | <b>GAAACTCAAAGGAATTGACGGGGGGCCCGCACAAAGCGGTGGAGCACGTGGTT</b> |            |      |            |  |
|    |  |         |  |    |     | CGCAAGGTT                                                     | <b>GAAACTCAAAGGAATTGACGGGGGGCCCGCACAAAGCGGTGGAGCATGTGGTT</b> |            |      |            |  |
|    |  |         |  |    |     | CGCAAGGTT                                                     | <b>GAAACTCAAAGGAATTGACGGGGGGCCCGCACAAAGCGGTGGAGTATGTGGTT</b> |            |      |            |  |
|    |  |         |  |    |     | CGCAAGAAT                                                     | <b>GAAACTCAAAGGAATTGACGGGGACCCCGCACAAAGCGGTGGAGCATGTGGTT</b> |            |      |            |  |
|    |  |         |  |    |     | CGCAAGAAT                                                     | <b>GAAACTCAAAGGAATTGACGGGGACCCCGCACAAAGCGGTGGAGCATGTGGTT</b> |            |      |            |  |
|    |  |         |  |    |     | ****                                                          | *****                                                        | *****      | **** | *****      |  |
|    |  |         |  |    |     | 965                                                           |                                                              | 1015       |      |            |  |
| gi |  | 5163477 |  | gb |     | AF157056.1                                                    |                                                              | <b>ASF</b> |      | <b>519</b> |  |
| gi |  | 5163471 |  | gb |     | AF157050.1                                                    |                                                              | <b>ASF</b> |      | <b>360</b> |  |
| gi |  | 5163470 |  | gb |     | AF157049.1                                                    |                                                              | <b>ASF</b> |      | <b>361</b> |  |
| gi |  | 5163476 |  | gb |     | AF157055.1                                                    |                                                              | <b>ASF</b> |      | <b>457</b> |  |
| gi |  | 5163473 |  | gb |     | AF157052.1                                                    |                                                              | <b>ASF</b> |      | <b>356</b> |  |
| gi |  | 5163472 |  | gb |     | AF157051.1                                                    |                                                              | <b>ASF</b> |      | <b>500</b> |  |
| gi |  | 5163475 |  | gb |     | AF157054.1                                                    |                                                              | <b>ASF</b> |      | <b>492</b> |  |
| gi |  | 5163474 |  | gb |     | AF157053.1                                                    |                                                              | <b>ASF</b> |      | <b>502</b> |  |
|    |  |         |  |    |     | TAATTCGATGATACGCGAGGAACCTTACCCGGGTTTGAACGCATATTGACAGCTCTGAA   |                                                              |            |      |            |  |
|    |  |         |  |    |     | TAATTCGAAGCAACGCGAAGAACCTTACCAGGTCTTGACATCTAGTGCCATCTAAGAGA   |                                                              |            |      |            |  |
|    |  |         |  |    |     | TAATTCGAAGCAACGCGAAGAACCTTACCAGGTCTTGACATCTTTTGACAATCCTAGAGA  |                                                              |            |      |            |  |
|    |  |         |  |    |     | TAATTCGATGCTAACCGAAGAACCTTACCTGGGTTTGACATCCACAGAAGGCGTTAGAGA  |                                                              |            |      |            |  |
|    |  |         |  |    |     | TAATTCGAAGCAACGCGAAGAACCTTACCAAGGCTTGACATCCTCTTGACGAATGTAGAG  |                                                              |            |      |            |  |
|    |  |         |  |    |     | TAATTCGAAGCAACGCGAAGAACCTTACCAGGCCTTGACATCCCGGCGACCGGTGTAGAG  |                                                              |            |      |            |  |
|    |  |         |  |    |     | TAATTCGAAGCAACGCGAAGAACCTTACCAGGCCTTGACATCCCGATGACCAAACATGTA  |                                                              |            |      |            |  |
|    |  |         |  |    |     | TAATTCGAAGCAACGCGAAGAACCTTACCTGGCCTTGACATCCCGGTGACAGCGAAGTAA  |                                                              |            |      |            |  |
|    |  |         |  |    |     | *****                                                         | * *    *** *****                                             | *    ***** | *    |            |  |
|    |  |         |  |    |     | 1025                                                          |                                                              | 1075       |      |            |  |
| gi |  | 5163477 |  | gb |     | AF157056.1                                                    |                                                              | <b>ASF</b> |      | <b>519</b> |  |
| gi |  | 5163471 |  | gb |     | AF157050.1                                                    |                                                              | <b>ASF</b> |      | <b>360</b> |  |
| gi |  | 5163470 |  | gb |     | AF157049.1                                                    |                                                              | <b>ASF</b> |      | <b>361</b> |  |
| gi |  | 5163476 |  | gb |     | AF157055.1                                                    |                                                              | <b>ASF</b> |      | <b>457</b> |  |
| gi |  | 5163473 |  | gb |     | AF157052.1                                                    |                                                              | <b>ASF</b> |      | <b>356</b> |  |
| gi |  | 5163472 |  | gb |     | AF157051.1                                                    |                                                              | <b>ASF</b> |      | <b>500</b> |  |
| gi |  | 5163475 |  | gb |     | AF157054.1                                                    |                                                              | <b>ASF</b> |      | <b>492</b> |  |
| gi |  | 5163474 |  | gb |     | AF157053.1                                                    |                                                              | <b>ASF</b> |      | <b>502</b> |  |
|    |  |         |  |    |     | ACAGAG-----TCTCTAGTAATAGCAATTTGCGAGGTGCTGCATGGTTGTCGTCAGCT    |                                                              |            |      |            |  |
|    |  |         |  |    |     | TTAGGA-----GTTCCCTTCGGGGACACTAAGACAGGTGGTGCATGGCTGTCGTCAGCT   |                                                              |            |      |            |  |
|    |  |         |  |    |     | TAGGAC-----TTTCCCTTCGGGGACAAAATGACAGGTGGTGCATGGTTGTCGTCAGCT   |                                                              |            |      |            |  |
|    |  |         |  |    |     | TAATGCTGTGCCTGATTTATCAGGAGCTGTGAGACAGGTGCTGCATGGCTGTCGTCAGCT  |                                                              |            |      |            |  |
|    |  |         |  |    |     | ATACAT-----TTTTTCTTCGGAACAAGGGAGACAGGTGGTGCATGGTTGTCGTCAGCT   |                                                              |            |      |            |  |
|    |  |         |  |    |     | ATACAC-----TTTCTTCTTCGGAAGCGCCGGTGACAGGTGGTGCATGGTTGTCGTCAGCT |                                                              |            |      |            |  |
|    |  |         |  |    |     | ATGTGT-----TTTCCCTTCGGGGCATTGGAGACAGGTGGTGCATGGTTGTCGTCAGCT   |                                                              |            |      |            |  |
|    |  |         |  |    |     | TGTTTCG-----TTTTCTTCGGGACACTGGAGACAGGTGGTGCATGGTTGTCGTCAGCT   |                                                              |            |      |            |  |
|    |  |         |  |    |     |                                                               | *    *****                                                   | *****      |      |            |  |

|    |  |         |  |    |  |            |  |     |     |                                                                |      |  |  |  |  |  |  |  |  |  |      |      |
|----|--|---------|--|----|--|------------|--|-----|-----|----------------------------------------------------------------|------|--|--|--|--|--|--|--|--|--|------|------|
| gi |  | 5163477 |  | gb |  | AF157056.1 |  | ASF | 519 | CGTGCCGTGAGGTGTTCGGCTTAAGTGCCATAACGAGCGCAACCCCTTATCACTAGTTACTA | 1085 |  |  |  |  |  |  |  |  |  | 1135 |      |
| gi |  | 5163471 |  | gb |  | AF157050.1 |  | ASF | 360 | CGTGTCGTGAGATGTTGGGTAAAGTCCCGCAACGAGCGCAACCCCTTGTTATTAGTTGCCA  |      |  |  |  |  |  |  |  |  |  |      |      |
| gi |  | 5163470 |  | gb |  | AF157049.1 |  | ASF | 361 | CGTGTCGTGAGATGTTGGGTAAAGTCCCGCAACGAGCGCAACCCCTTATTGTTAGTTGCCA  |      |  |  |  |  |  |  |  |  |  |      |      |
| gi |  | 5163476 |  | gb |  | AF157055.1 |  | ASF | 457 | CGTGCCGTGAGGTGTTGGGTAAAGTCCCGCAACGAGCGCAACCCCTATTTCCAGTTGCTA   |      |  |  |  |  |  |  |  |  |  |      |      |
| gi |  | 5163473 |  | gb |  | AF157052.1 |  | ASF | 356 | CGTGTCGTGAGATGTTGGGTAAAGTCCCGCAACGAGCGCAACCCCTTATCTTCAGTAGCCA  |      |  |  |  |  |  |  |  |  |  |      |      |
| gi |  | 5163472 |  | gb |  | AF157051.1 |  | ASF | 500 | CGTGTCGTGAGATGTTGGGTAAAGTCCCGCAACGAGCGCAACCCCTTATTGTTAGTTGCTA  |      |  |  |  |  |  |  |  |  |  |      |      |
| gi |  | 5163475 |  | gb |  | AF157054.1 |  | ASF | 492 | CGTGTCGTGAGATGTTGGGTAAAGTCCCGCAACGAGCGCAACCCCTGTTCCAGTAGCCA    |      |  |  |  |  |  |  |  |  |  |      |      |
| gi |  | 5163474 |  | gb |  | AF157053.1 |  | ASF | 502 | CGTGTCGTGAGATGTTGGGTAAAGTCCCGCAACGAGCGCAACCCCTTACCTTCAGTAGCCA  |      |  |  |  |  |  |  |  |  |  |      |      |
|    |  |         |  |    |  |            |  |     |     | ***** ** *                                                     |      |  |  |  |  |  |  |  |  |  |      |      |
|    |  |         |  |    |  |            |  |     |     |                                                                | 1145 |  |  |  |  |  |  |  |  |  |      | 1195 |
| gi |  | 5163477 |  | gb |  | AF157056.1 |  | ASF | 519 | ACAGGTCATGCTGAGGACTCTAGTGAGACTGCCAGCGTAAGCTGTGAGGAAGGTGGGGAT   |      |  |  |  |  |  |  |  |  |  |      |      |
| gi |  | 5163471 |  | gb |  | AF157050.1 |  | ASF | 360 | GCATTA--AGTTGGGCACTCTAATGAGACTGCCGGTGACAAACCGGAGGAAGGTGGGGAT   |      |  |  |  |  |  |  |  |  |  |      |      |
| gi |  | 5163470 |  | gb |  | AF157049.1 |  | ASF | 361 | GCATTA--AGTTGGGCACTCTAGCAAGACTGCCGGTGACAAACCGGAGGAAGGTGGGGAT   |      |  |  |  |  |  |  |  |  |  |      |      |
| gi |  | 5163476 |  | gb |  | AF157055.1 |  | ASF | 457 | ACGTTTGAAGCTGAGCACTCTGGAGAGACTGCCAGCGATAAGCTGGAGGAAGGTGGGGAC   |      |  |  |  |  |  |  |  |  |  |      |      |
| gi |  | 5163473 |  | gb |  | AF157052.1 |  | ASF | 356 | GCAGGTAGAGCTGGGCACTCTGGAGAGACTGCCGTGGATAACACGGAGGAAGGTGGGGAT   |      |  |  |  |  |  |  |  |  |  |      |      |
| gi |  | 5163472 |  | gb |  | AF157051.1 |  | ASF | 500 | C-----GCAAGAGCACTCTAGCGAGACTGCCGTTGACAAACCGGAGGAAGGTGGGGAC     |      |  |  |  |  |  |  |  |  |  |      |      |
| gi |  | 5163475 |  | gb |  | AF157054.1 |  | ASF | 492 | GCGGATAGAGCCGGGCCTCTGGGGAGACTGCCGGGGACAACCCGGAGGAAGGCGGGGAC    |      |  |  |  |  |  |  |  |  |  |      |      |
| gi |  | 5163474 |  | gb |  | AF157053.1 |  | ASF | 502 | GCATTTAG-GATGGGCACTCTGGAGGGACTGCCAGGGACAACYTGGAGGAAGGTGGGGAT   |      |  |  |  |  |  |  |  |  |  |      |      |
|    |  |         |  |    |  |            |  |     |     | * * *****                                                      |      |  |  |  |  |  |  |  |  |  |      |      |
|    |  |         |  |    |  |            |  |     |     |                                                                | 1205 |  |  |  |  |  |  |  |  |  |      |      |
| gi |  | 5163477 |  | gb |  | AF157056.1 |  | ASF | 519 | GACGTCAAATCAGCACGGCCCTTACATCCGGGGCGACACACGTGTTACAATGGTGGGGAC   |      |  |  |  |  |  |  |  |  |  |      |      |
| gi |  | 5163471 |  | gb |  | AF157050.1 |  | ASF | 360 | GACGTCAAATCAGCACGGCCCTTATGACCTGGGCTACACACGTGCTACAATGGGCAGTAC   |      |  |  |  |  |  |  |  |  |  |      |      |
| gi |  | 5163470 |  | gb |  | AF157049.1 |  | ASF | 361 | GACGTCAAATCAGCACGGCCCTTATGACCTGGGCTACACACGTGCTACAATGGGCAGTAC   |      |  |  |  |  |  |  |  |  |  |      |      |
| gi |  | 5163476 |  | gb |  | AF157055.1 |  | ASF | 457 | GACGTCAAATCAGCACGGCCCTTATGTCCAGGGCTACACACGTGCTACAATGGCATAATC   |      |  |  |  |  |  |  |  |  |  |      |      |
| gi |  | 5163473 |  | gb |  | AF157052.1 |  | ASF | 356 | GACGTCAAATCAGCACGGCCCTTATGTCTTGGGCAACACACGTGCTACAATGGCTAGAAA   |      |  |  |  |  |  |  |  |  |  |      |      |
| gi |  | 5163472 |  | gb |  | AF157051.1 |  | ASF | 500 | GACGTCAAATCAGCACGGCCCTTATGTCTTGGGCAACACACGTGCTACAATGGTGGTCAA   |      |  |  |  |  |  |  |  |  |  |      |      |
| gi |  | 5163475 |  | gb |  | AF157054.1 |  | ASF | 492 | GACGTCAAATCAGCACGGCCCTTATGGCCTGGGCTACACACGTGCTACAATGACGCAGAC   |      |  |  |  |  |  |  |  |  |  |      |      |
| gi |  | 5163474 |  | gb |  | AF157053.1 |  | ASF | 502 | GACGTCAAATCAGCACGGCCCTTATGGCCAGGGCTACACACGTGCTACAATGGCGTAAAC   |      |  |  |  |  |  |  |  |  |  |      |      |
|    |  |         |  |    |  |            |  |     |     | ***** ** *                                                     |      |  |  |  |  |  |  |  |  |  |      |      |
|    |  |         |  |    |  |            |  |     |     |                                                                | 1265 |  |  |  |  |  |  |  |  |  |      |      |
| gi |  | 5163477 |  | gb |  | AF157056.1 |  | ASF | 519 | AAAGGGCAGCTACCGT-G-TGAGCGGATGCTAATCTCCAAACCCCATCTCAGTTCGGGATC  |      |  |  |  |  |  |  |  |  |  |      |      |
| gi |  | 5163471 |  | gb |  | AF157050.1 |  | ASF | 360 | AACGAGAAGCGAGC-CTGCGAAGGCAAGCGGATCTCTTAAAGCTGTTCTCAGTTCGGACT   |      |  |  |  |  |  |  |  |  |  |      |      |
| gi |  | 5163470 |  | gb |  | AF157049.1 |  | ASF | 361 | AACGAGTCGCAAGA-CCGCGAGGTTTAGCAAATCTCTTAAAGCCGTTCTCAGTTCGGATT   |      |  |  |  |  |  |  |  |  |  |      |      |
| gi |  | 5163476 |  | gb |  | AF157055.1 |  | ASF | 457 | AGAGGGAAGCATCT-CCGCAAGGATAAGCGAATCTCATAAATTATGTCTCAGTTCAGATT   |      |  |  |  |  |  |  |  |  |  |      |      |
| gi |  | 5163473 |  | gb |  | AF157052.1 |  | ASF | 356 | CAAAGTGAAGCGAGACGGTGACGTTAAGCAAAGCACAAAAACCTAGTCCCAGTTCGGATT   |      |  |  |  |  |  |  |  |  |  |      |      |
| gi |  | 5163472 |  | gb |  | AF157051.1 |  | ASF | 500 | CAGAGGGAAGCAAA-ACCGCGAGGTGGAGCAAATCCCTAAAAGCCATCCCAGTTCGGATC   |      |  |  |  |  |  |  |  |  |  |      |      |
| gi |  | 5163475 |  | gb |  | AF157054.1 |  | ASF | 492 | AGAGGGAAGCGAAG-CCGCGAGGTGGAGCAAACCCAGAAATGGCGTCTCAGTTCGGACT    |      |  |  |  |  |  |  |  |  |  |      |      |
| gi |  | 5163474 |  | gb |  | AF157053.1 |  | ASF | 502 | AAAGAGAAGCGACC-ACGCGAGTGTGAGCGAATCTCAAAAATAACGTCTCAGTTCGGATT   |      |  |  |  |  |  |  |  |  |  |      |      |
|    |  |         |  |    |  |            |  |     |     | * **** ** ***** *                                              |      |  |  |  |  |  |  |  |  |  |      |      |

|    |  |         |  |      |  |            |  |            |            |                                                               |
|----|--|---------|--|------|--|------------|--|------------|------------|---------------------------------------------------------------|
|    |  |         |  | 1325 |  |            |  |            | 1375       |                                                               |
| gi |  | 5163477 |  | gb   |  | AF157056.1 |  | <b>ASF</b> | <b>519</b> | GAAGTCTGCAACCCGACTTCGTGAAGCTGGATTTCGCTAGTAATCGCGCATCAGCCATGGC |
| gi |  | 5163471 |  | gb   |  | AF157050.1 |  | <b>ASF</b> | <b>360</b> | GCAGTCTGCAACTCGACTGCACGAAGCTGGAATCGCTAGTAATCGCGGATCAGCA-CGCC  |
| gi |  | 5163470 |  | gb   |  | AF157049.1 |  | <b>ASF</b> | <b>361</b> | GTAGGCTGCAACTCGCCTACATGAAGTCGGAATCGCTAGTAATCGCGGATCAGCA-TGCC  |
| gi |  | 5163476 |  | gb   |  | AF157055.1 |  | <b>ASF</b> | <b>457</b> | GCAGTCTGCAACTCGACTGCATGAAGTCGGAATCGCTAGTAATCGCAGATCAGCAAAGCT  |
| gi |  | 5163473 |  | gb   |  | AF157052.1 |  | <b>ASF</b> | <b>356</b> | GTAGTCTGCAACTCGAGTACATGAAGTCGGAATCGCTAGTAATCGCAAATCAGAA-TGTT  |
| gi |  | 5163472 |  | gb   |  | AF157051.1 |  | <b>ASF</b> | <b>500</b> | GCAGGCTGCAACCCGCCTGCGTGAAGTTGGAATCGCTAGTAATCGCGGATCAGCA-TGCC  |
| gi |  | 5163475 |  | gb   |  | AF157054.1 |  | <b>ASF</b> | <b>492</b> | GCAGCTGCAACTCGGTGCACGAAGCCGGAATCGCTAGTAATCGCAGATCAGCA-TGCT    |
| gi |  | 5163474 |  | gb   |  | AF157053.1 |  | <b>ASF</b> | <b>502</b> | GTAGTCTGCAACTCGACTACATGAAGTCGGAATCGCTAGTAATCGCAGATCAGAA-TGCT  |
|    |  |         |  |      |  |            |  |            |            | * ** ***** ** * * **** ** *                                   |
|    |  |         |  | 1385 |  |            |  |            | 1435       |                                                               |
| gi |  | 5163477 |  | gb   |  | AF157056.1 |  | <b>ASF</b> | <b>519</b> | GCGGTGAATACGTTCCCGGGCCTTGTACACACCGCCCCTCAAGCCATGGGAGTTGGGGGT  |
| gi |  | 5163471 |  | gb   |  | AF157050.1 |  | <b>ASF</b> | <b>360</b> | GCGGTGAATACGTTCCCGGGCCTTGTACACACCGCCCCTCACACCATGGAAGTCTGCAAT  |
| gi |  | 5163470 |  | gb   |  | AF157049.1 |  | <b>ASF</b> | <b>361</b> | GCGGTGAATACGTTCCCGGGCCTTGTACACACCGCCCCTCACACCATGAGAGTTTGTAAAC |
| gi |  | 5163476 |  | gb   |  | AF157055.1 |  | <b>ASF</b> | <b>457</b> | GCGGTGAATACGTTCCCGGGCCTTGTACACACCGCCCCTCACACCACGGGAGTCGGTCGC  |
| gi |  | 5163473 |  | gb   |  | AF157052.1 |  | <b>ASF</b> | <b>356</b> | GCGGTGAATACGTTCCCGGGCCTTGTACACACCGCCCCTCACACCATGGGAGTTGGAAGC  |
| gi |  | 5163472 |  | gb   |  | AF157051.1 |  | <b>ASF</b> | <b>500</b> | GCGGTGAATACGTTCCCGGGCCTTGTACACACCGCCCCTCACACCATGAGAGTCGGGAAC  |
| gi |  | 5163475 |  | gb   |  | AF157054.1 |  | <b>ASF</b> | <b>492</b> | GCGGTGAATACGTTCCCGGGTCTTGTACACACCGCCCCTCACACCATGGGAGTCGGAAAT  |
| gi |  | 5163474 |  | gb   |  | AF157053.1 |  | <b>ASF</b> | <b>502</b> | GCGGTGAATACGTTCCCGGGTCTTGTACACACCGCCCCTCACACCATGGGAGTCAGTAAAC |
|    |  |         |  |      |  |            |  |            |            | *****                                                         |
|    |  |         |  | 1445 |  |            |  |            | 1495       |                                                               |
| gi |  | 5163477 |  | gb   |  | AF157056.1 |  | <b>ASF</b> | <b>519</b> | ACCTAAAGTCCGTAACCGCAAGGAT-----CGGCCTAGGGTAAAACCGATGA          |
| gi |  | 5163471 |  | gb   |  | AF157050.1 |  | <b>ASF</b> | <b>360</b> | GCCCGAAGCCGGTGGCCTAACCATTATGTGGAAGGAGCCGTCTAAGGCAGGGCAGATGA   |
| gi |  | 5163470 |  | gb   |  | AF157049.1 |  | <b>ASF</b> | <b>361</b> | ACCCAAAGCCGGTGGGGTAAACCTTT---TGGAGCCAGCCGTCTAAGGTGGGACAGATGA  |
| gi |  | 5163476 |  | gb   |  | AF157055.1 |  | <b>ASF</b> | <b>457</b> | GCCTGAAGCCGGTGGCCTATCAGTAAT--GG--GGGAGCCGTCTATGGCGAGATTGGTAA  |
| gi |  | 5163473 |  | gb   |  | AF157052.1 |  | <b>ASF</b> | <b>356</b> | GCCCGAAGTCGATGACCTAACC CGGAG--GG--AGGAGTCGCGAAGGTGAAGCCAGTGA  |
| gi |  | 5163472 |  | gb   |  | AF157051.1 |  | <b>ASF</b> | <b>500</b> | ACCCGAAGTCCGTAGCCTAACAGCAAT--GG--GGCGCGGCCGAAGGTGGGTTTCGATAA  |
| gi |  | 5163475 |  | gb   |  | AF157054.1 |  | <b>ASF</b> | <b>492</b> | GCCCGAAGTCAGTGGCCCAACCGCAA---GGAGGGAGCTGCCGAAGGCAGGTCCGGTGA   |
| gi |  | 5163474 |  | gb   |  | AF157053.1 |  | <b>ASF</b> | <b>502</b> | GCCCGAAGCCGGTGAACCAACCTAASC--AGGAGGGAGCCGTGGAAGGCCGGACGGATGA  |
|    |  |         |  |      |  |            |  |            |            | ** *** * * * * * ** * ** *                                    |
|    |  |         |  | 1505 |  |            |  |            | 1525       |                                                               |
| gi |  | 5163477 |  | gb   |  | AF157056.1 |  | <b>ASF</b> | <b>519</b> | CTGGGGTGAAGTCGTAACAAGGTAGCCGT-----                            |
| gi |  | 5163471 |  | gb   |  | AF157050.1 |  | <b>ASF</b> | <b>360</b> | CTGGGGTGAAGTCGTAACAAGGTAGCCGTAGGAGAACCCTGCG                   |
| gi |  | 5163470 |  | gb   |  | AF157049.1 |  | <b>ASF</b> | <b>361</b> | TTAGGGTGAAGTCGTAACAAGGTAGCCGTAGGAGAACCCTGCG                   |
| gi |  | 5163476 |  | gb   |  | AF157055.1 |  | <b>ASF</b> | <b>457</b> | CTGGGGTGAAGTCGTAACAAGGTAGCCGTACCGGAAGGTGCG                    |
| gi |  | 5163473 |  | gb   |  | AF157052.1 |  | <b>ASF</b> | <b>356</b> | CTGGGGTGAAGTCGTAACAAGGTAGCCGTATCGGAAGGTGCG                    |
| gi |  | 5163472 |  | gb   |  | AF157051.1 |  | <b>ASF</b> | <b>500</b> | TTGGGGTGAAGTCGTAACAAGGTAGCCGTATCGGAAGGTGCG                    |
| gi |  | 5163475 |  | gb   |  | AF157054.1 |  | <b>ASF</b> | <b>492</b> | CTGGGGTGAAGTCGTAACAAGGTAGCCGTATCGGAAGGTGCG                    |
| gi |  | 5163474 |  | gb   |  | AF157053.1 |  | <b>ASF</b> | <b>502</b> | CTGGGGTGAAGTCGTAACAAGGTAGCCGTATCGGAAGGTGCG                    |
|    |  |         |  |      |  |            |  |            |            | * *** *****                                                   |

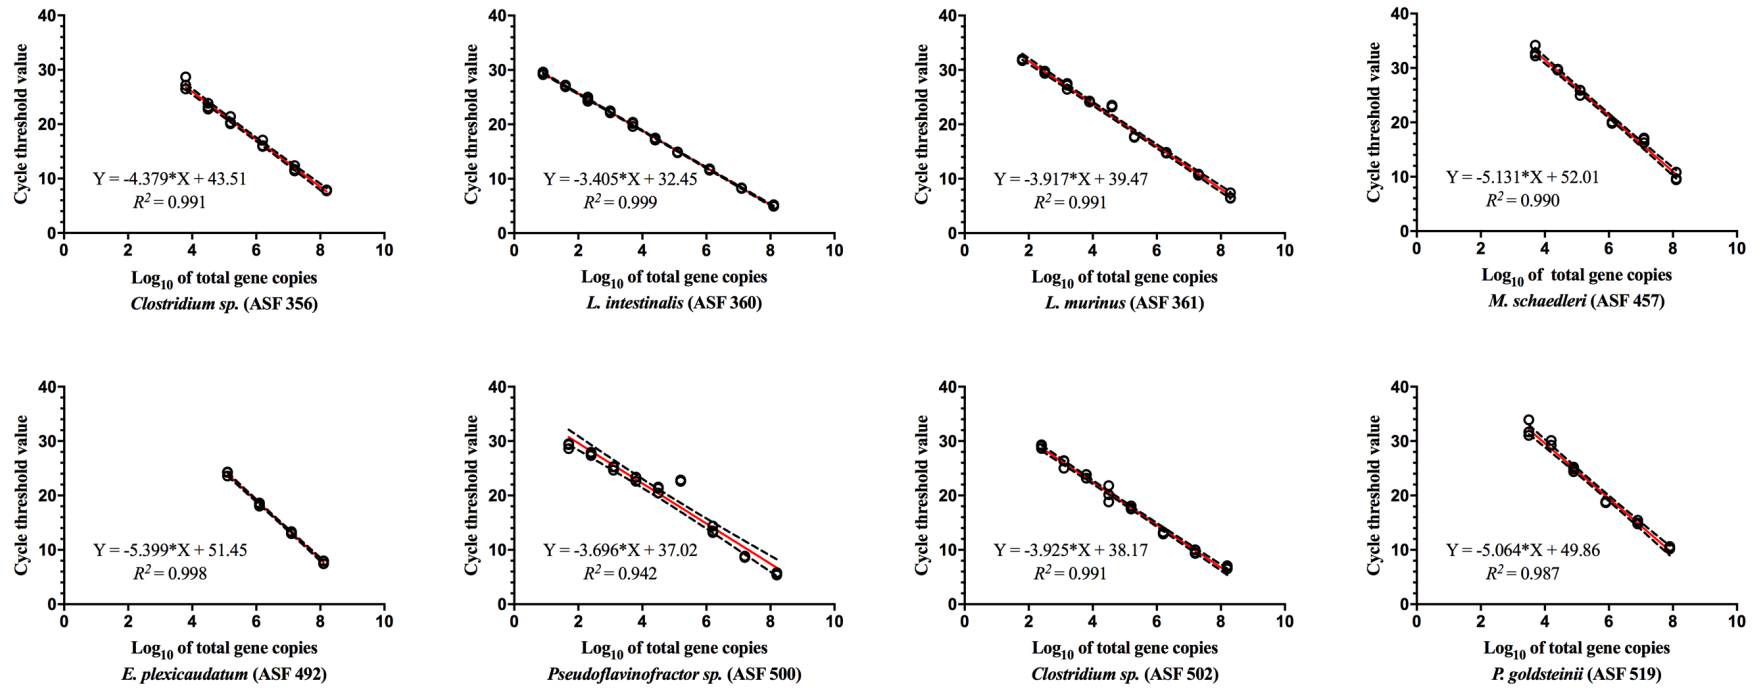

**Fig. S2.** Linear regression model for SYBR Green Master Mix B depicting the standard curve parameters for ASF quantification. Standard curves were prepared using serial dilutions of purified vector-free plasmid DNA containing the specific 16S rRNA gene sequence for each ASF taxon and used to determine the limit of detection and efficiency of each reaction. The predicted linear model line (red) and estimated equation are shown for each ASF taxon based on the log<sub>10</sub> of total 16S rRNA gene copies, along with dotted lines representing the 95% confidence interval bands. Triplicates of each plasmid concentration were used to determine precision in quantification (open black circles). R-squared values are also shown for each curve. The final number for the log<sub>10</sub> of total 16S rRNA gene copies for each ASF bacterium was calculated considering five copies of this gene per bacterial genome.

A real-time PCR assay for accurate quantification of the individual members of the Altered Schaedler Flora microbiota in gnotobiotic mice, Gomes-Neto et al.

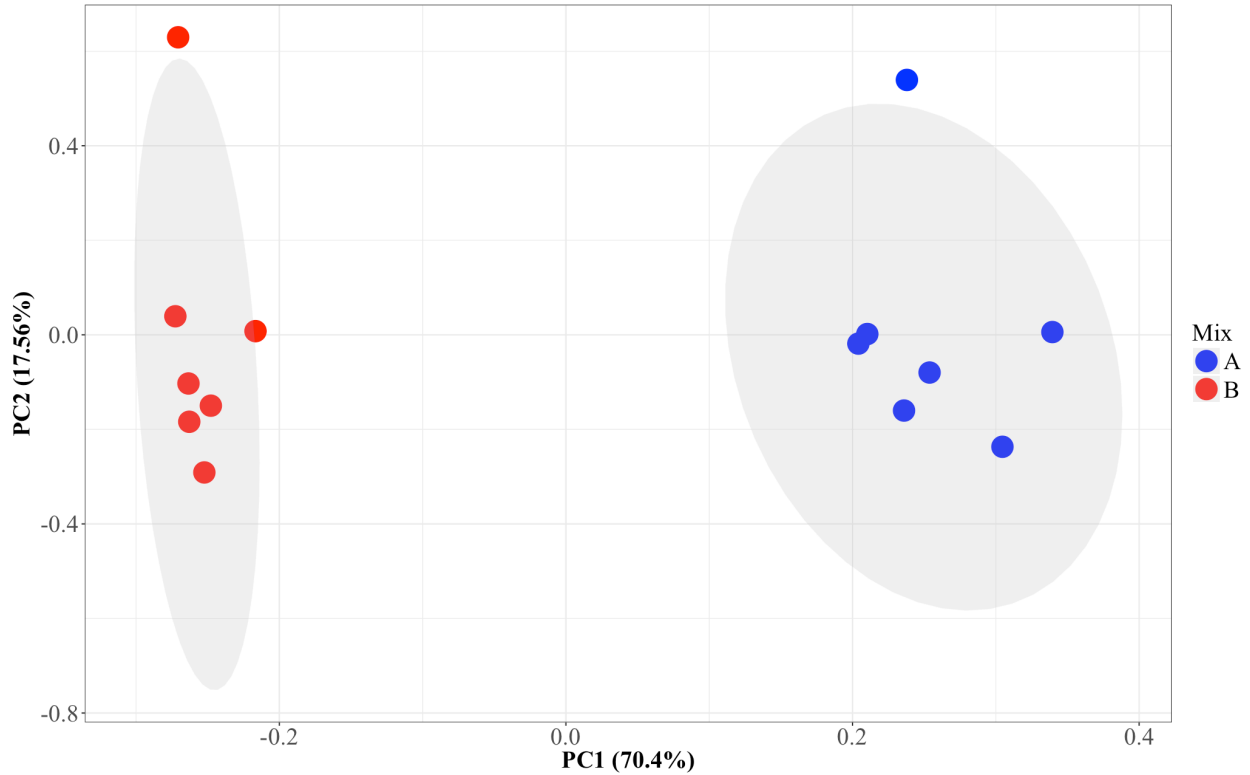

**Fig. S3.** PCA plot depicting how the ASF community clusters when comparing the  $\log_{10}$  of total 16S rRNA gene copies per gram of cecal contents between mouse genotypes (i.e., Mix A in blue and Mix B in red). The x- and y-axes indicate the principal components 1 (PC1) and 2 (PC2) and include the percent of variance explained by each PC. Each dot in the PCA plot represents an individual animal and its respective ASF member abundances. Gray shaded ellipses represent dispersion of the data points within treatments and were calculated based on a multivariate T distribution. All qPCRs were run in duplicate for both master mixes. Estimated ASF abundances were achieved using the corresponding plasmid standard curve for each mix.

A real-time PCR assay for accurate quantification of the individual members of the Altered Schaedler Flora microbiota in gnotobiotic mice, Gomes-Neto et al.

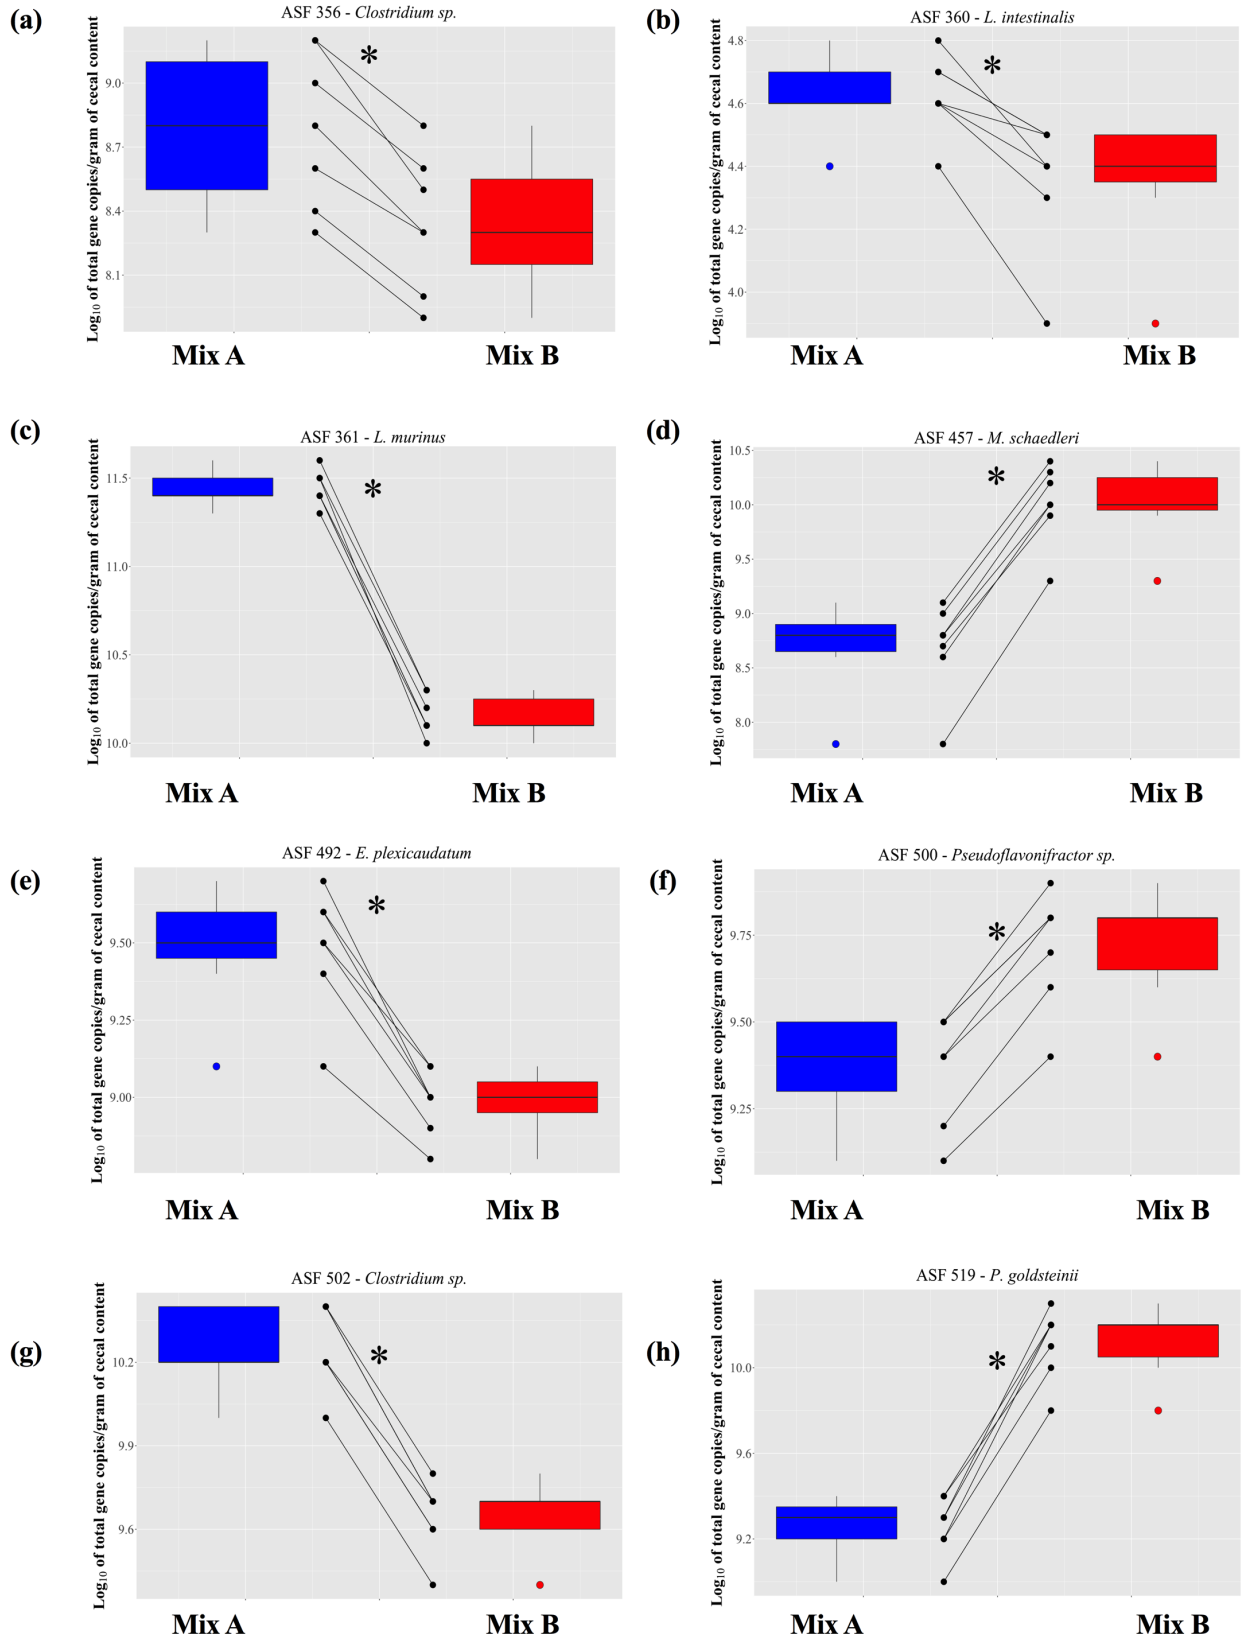

**Fig. S4.** Box-and-whisker plots showing quantification of the ASF bacterial species, based on the 16S rRNA copy number, in cecal contents of gnotobiotic C57BL/6 (n = 7) mice when comparing two qPCR SYBR Green master mixes (Mix A in blue and Mix B in red; Panels a-h). In each graph, the y-axis indicates the ASF taxon  $\log_{10}$  of total 16S rRNA gene copies per gram of cecal contents, and the x-axis depicts each ASF member taxonomy and identification number. Whiskers depict the 1.5 x IQR (i.e., IQR = interquartile range as the distance between the first and third quartiles), the horizontal bar in the middle of the box represents the median value, and red and blue circles above or below whiskers indicate possible outliers. Black circles (in the middle of each graph) indicate each individual observation, and the black lines show the directionality of change in bacterial abundance across all samples for each ASF member when results from the two Master Mixes were compared. Asterisks refer to the degree of significance for the difference in bacterial abundance as determined by the non-parametric Wilcoxon matched-pairs signed rank test using a two-tailed distribution for p-value calculations (\*  $p \leq 0.05$ , \*\*  $p \leq 0.01$ , \*\*\*  $p \leq 0.001$ , and \*\*\*\*  $p \leq 0.0001$ ). All qPCRs were run in duplicate for both SYBR Green mixes.

A real-time PCR assay for accurate quantification of the individual members of the Altered Schaedler Flora microbiota in gnotobiotic mice, Gomes-Neto et al.

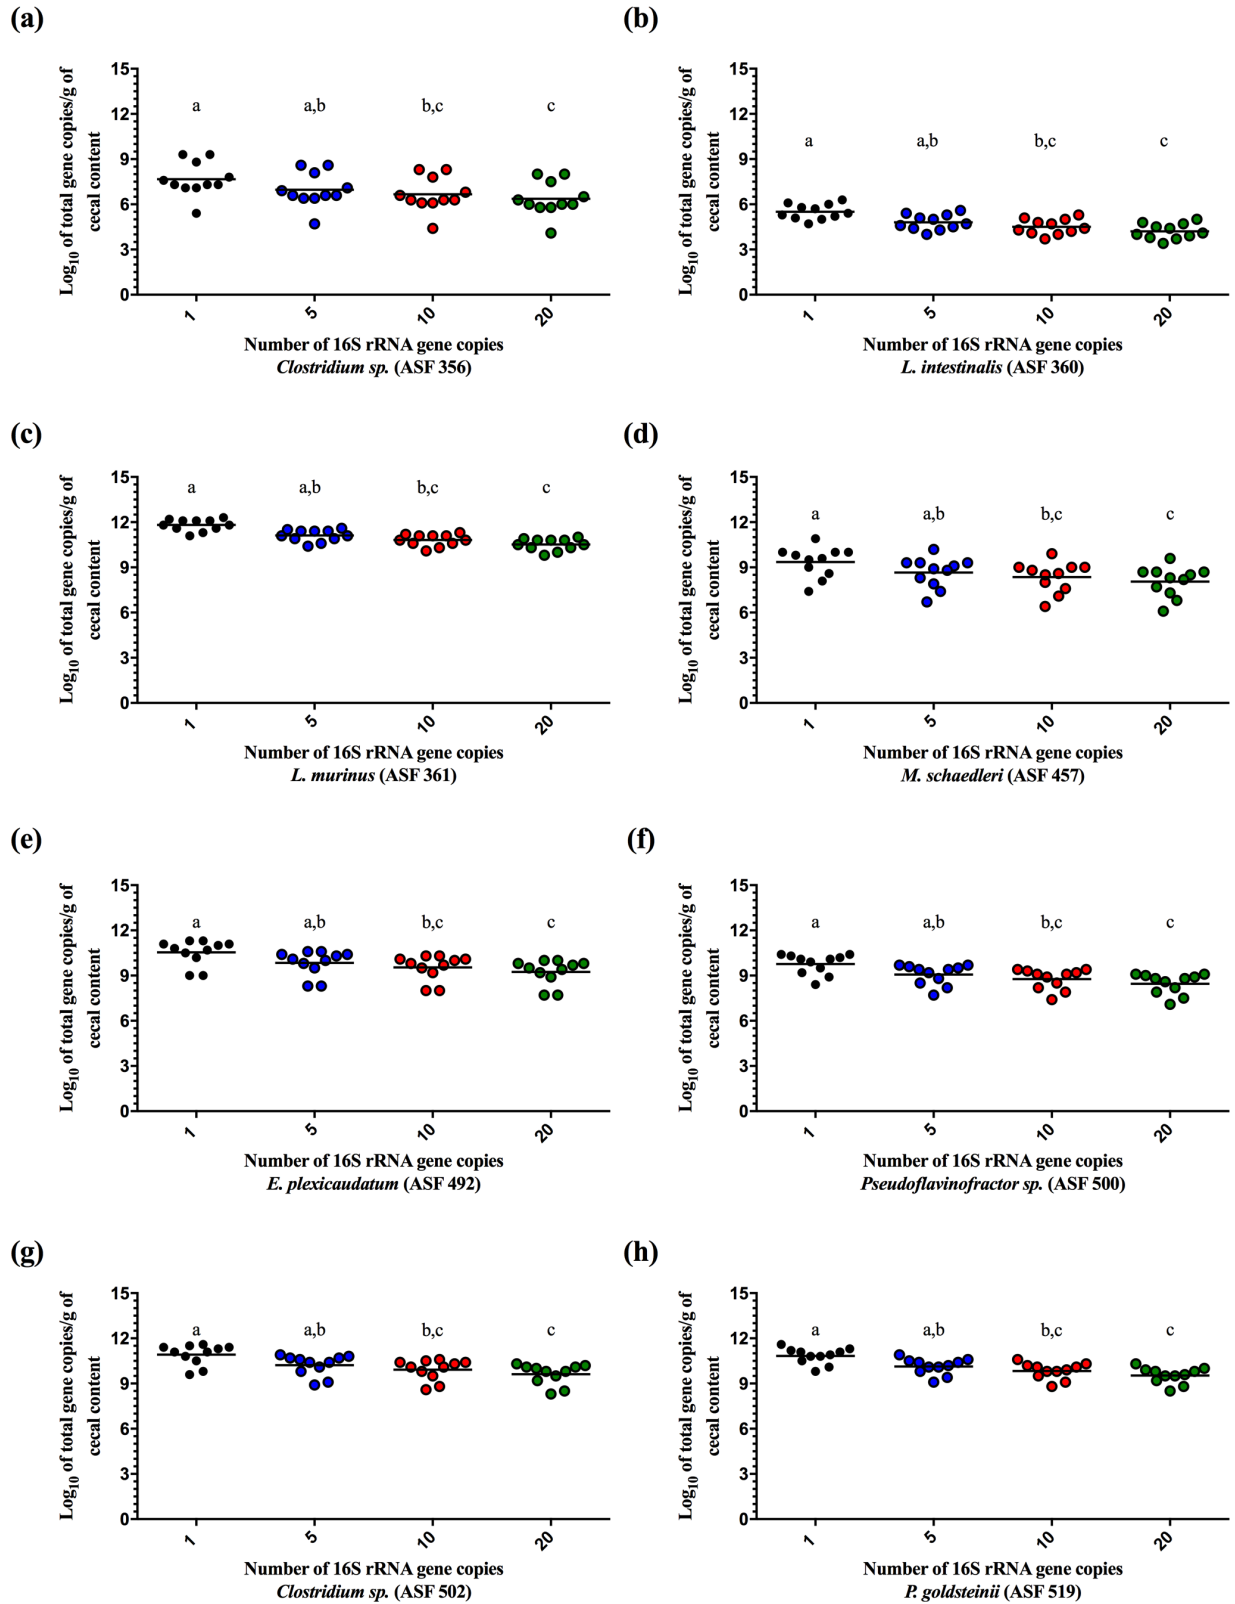



**Fig. S5.** Dot plots showing quantification of each ASF bacterial species based on either 1, 5, 10 or 20 copies of the 16S rRNA gene in cecal contents of gnotobiotic C3H/HeN mice (n = 11). The y-axis indicates the ASF taxon  $\log_{10}$  of total 16S rRNA gene copies per gram of cecal contents. The x-axis depicts the number of 16S rRNA gene copies used to estimate the total bacterial abundance (y-axis values) by ASF member using the linear equation model generated with the plasmid standard curves as shown in Table S1 (Panels a-h). Asterisks refer to the degree of significance for the difference between the estimated bacterial abundances as determined by the Friedman's test (non-parametric Anova using matched row values across groups) followed by a pairwise comparison across all groups using the Dunn's test. Differing letters depicted in the figures indicate significant differences across groups ( $p < 0.05$ ). All qPCRs were run in duplicate using SYBR Green Master Mix A. Estimated ASF abundances were achieved using the corresponding plasmid standard curve. Each dot in all plots represents an individual mouse.

A real-time PCR assay for accurate quantification of the individual members of the Altered Schaedler Flora microbiota in gnotobiotic mice, Gomes-Neto et al.

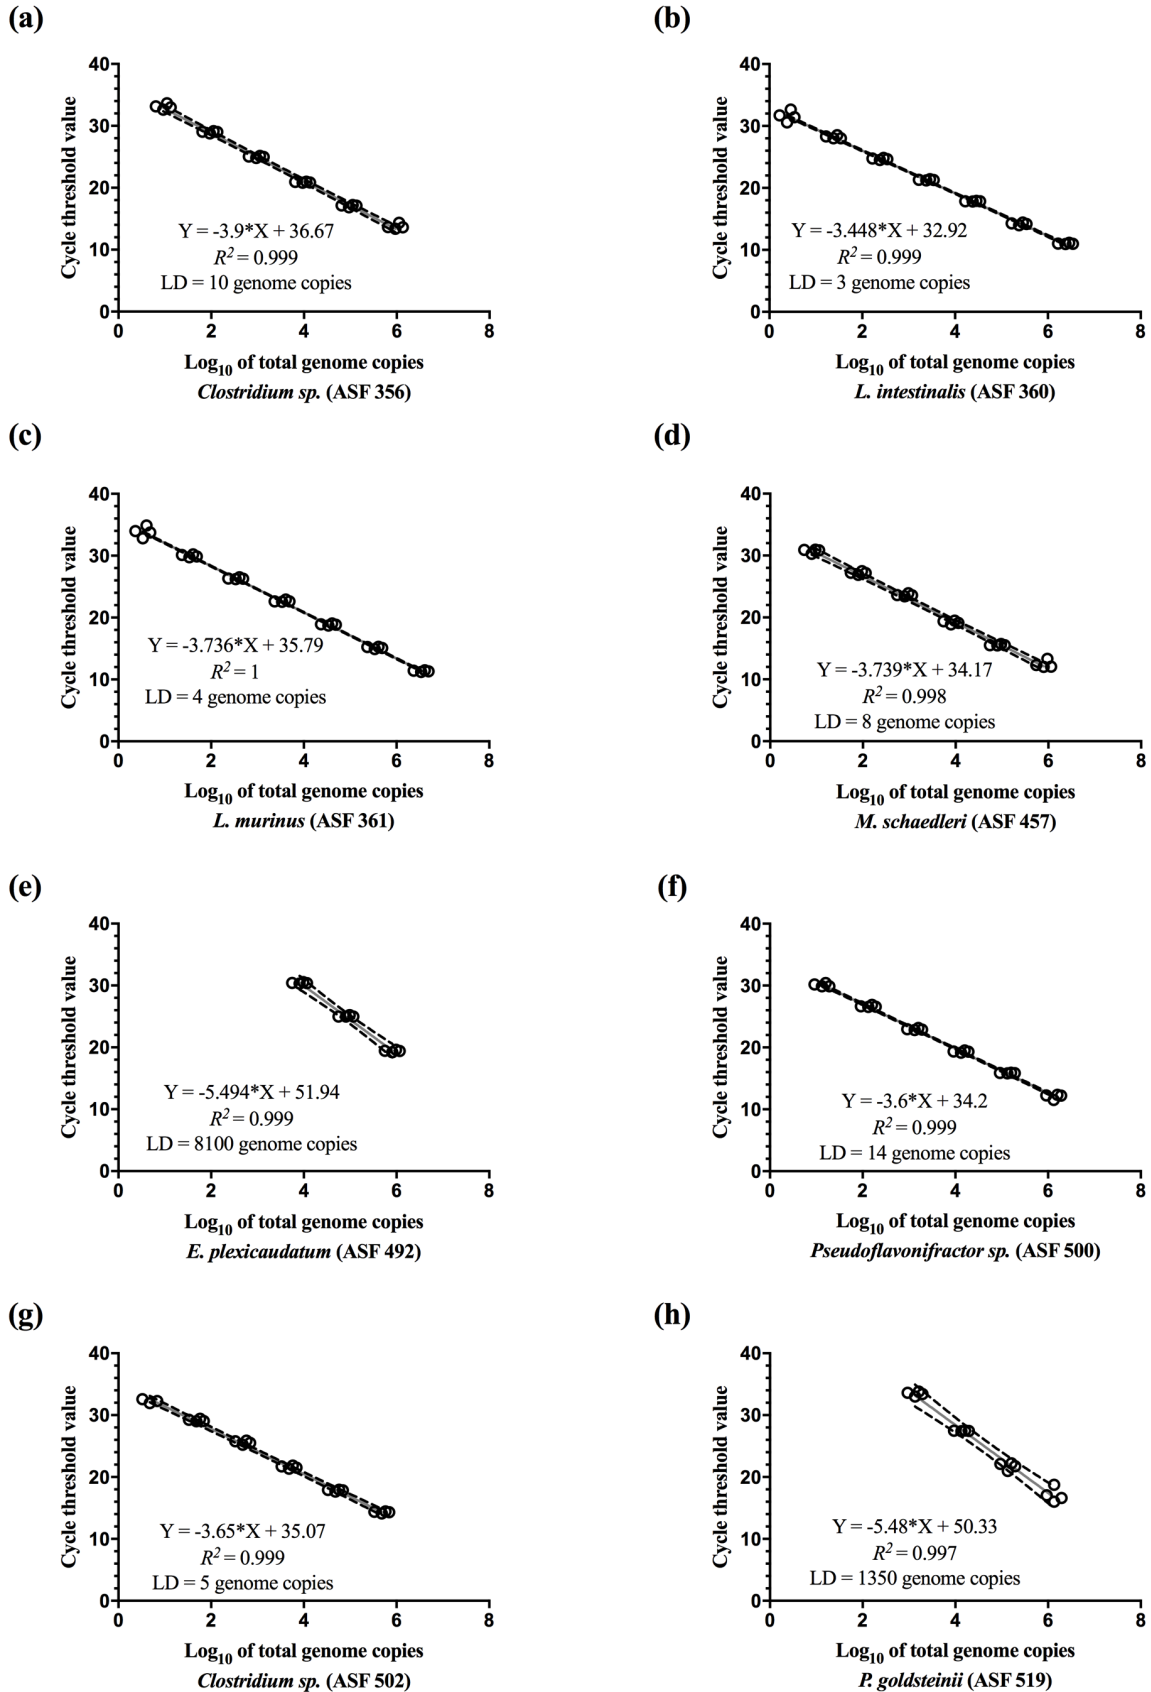

**Fig. S6.** Linear regression model depicting the standard curve parameters for ASF quantification based on total genome copies of each taxon using molecular grade water as a reaction matrix. Standard curves were prepared using ten-fold serial dilutions of purified genomic DNA in molecular grade water from each ASF bacterium. The predicted linear model line (gray), estimated equation, R-squared values and limit of detection (LD) are shown for each ASF bacterium based on the  $\log_{10}$  of total genome copies calculated using the total genome mass for each taxon and the total number of base pairs per bacterial genome. Also shown are the 95% confidence interval bands (black dotted lines) and serial dilution points (open black circles). The final number for the  $\log_{10}$  of total genome copies for each ASF bacterium was calculated without correcting for the number of 16S rRNA copies. All reactions were run in quadruplicate using SYBR Green Master Mix B.

A real-time PCR assay for accurate quantification of the individual members of the Altered Schaedler Flora microbiota in gnotobiotic mice, Gomes-Neto et al.

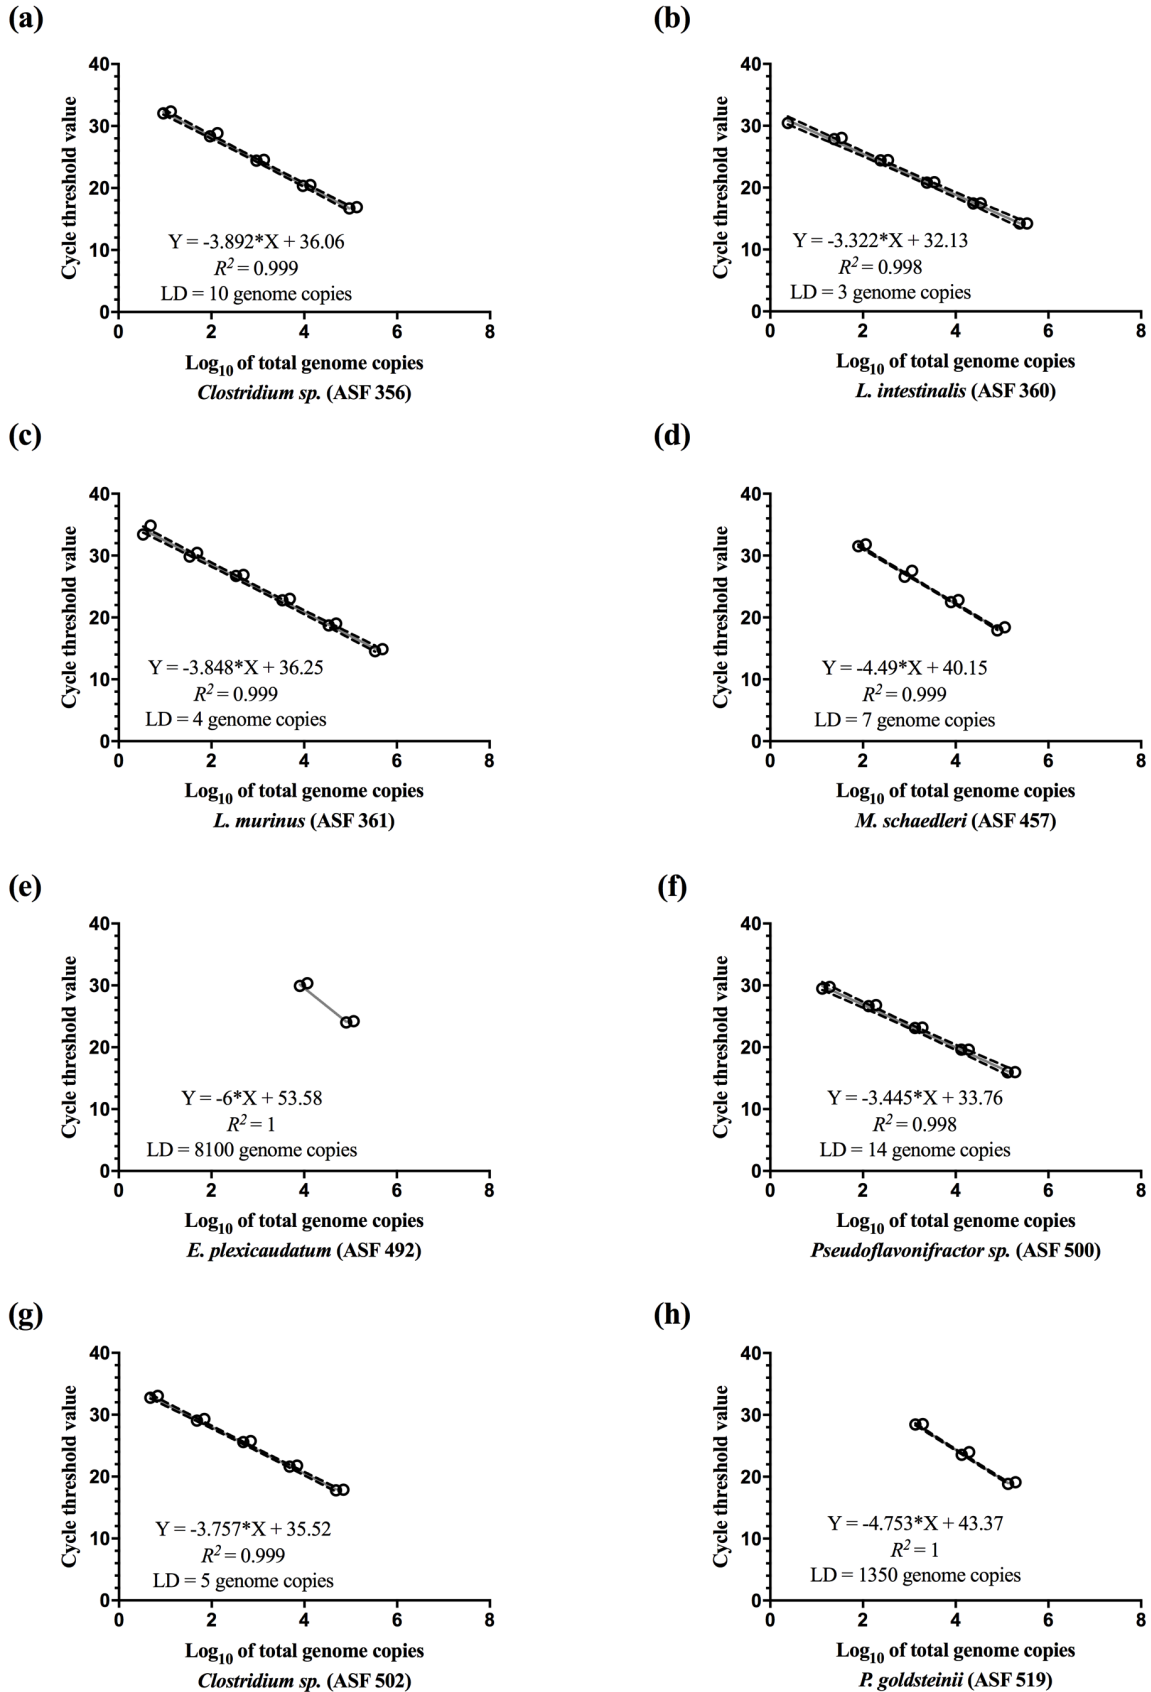

**Fig. S7.** Linear regression model depicting the standard curve parameters for ASF quantification based on total genome copies of each taxon using DNA extracted from feces of germ-free mice as a reaction matrix. Standard curves were prepared using ten-fold serial dilutions of purified genomic DNA from each ASF in DNA extracted from the feces of germ-free C3H/HeN and C57BL/6 mice (mixed 1:1 for each genotype) to verify that the reaction matrix (i.e., DNA extracted from feces versus molecular grade water; Fig. S7) did not affect assay performance. The predicted linear model line (gray), estimated equation, R-squared values and limit of detection (LD) are shown for each ASF bacterium based on the  $\log_{10}$  of total genome copies calculated using the total genome mass for each taxon and the total number of base pairs. Also shown are the 95% confidence interval bands (black dotted lines) and serial dilution points (open black circles). The final number for the  $\log_{10}$  of total genome copies for each ASF bacterium was calculated without correcting for the number of 16S rRNA copies. All reactions were run in duplicate using the SYBR Green Master Mix B.

A real-time PCR assay for accurate quantification of the individual members of the Altered Schaedler Flora microbiota in gnotobiotic mice, Gomes-Neto et al.

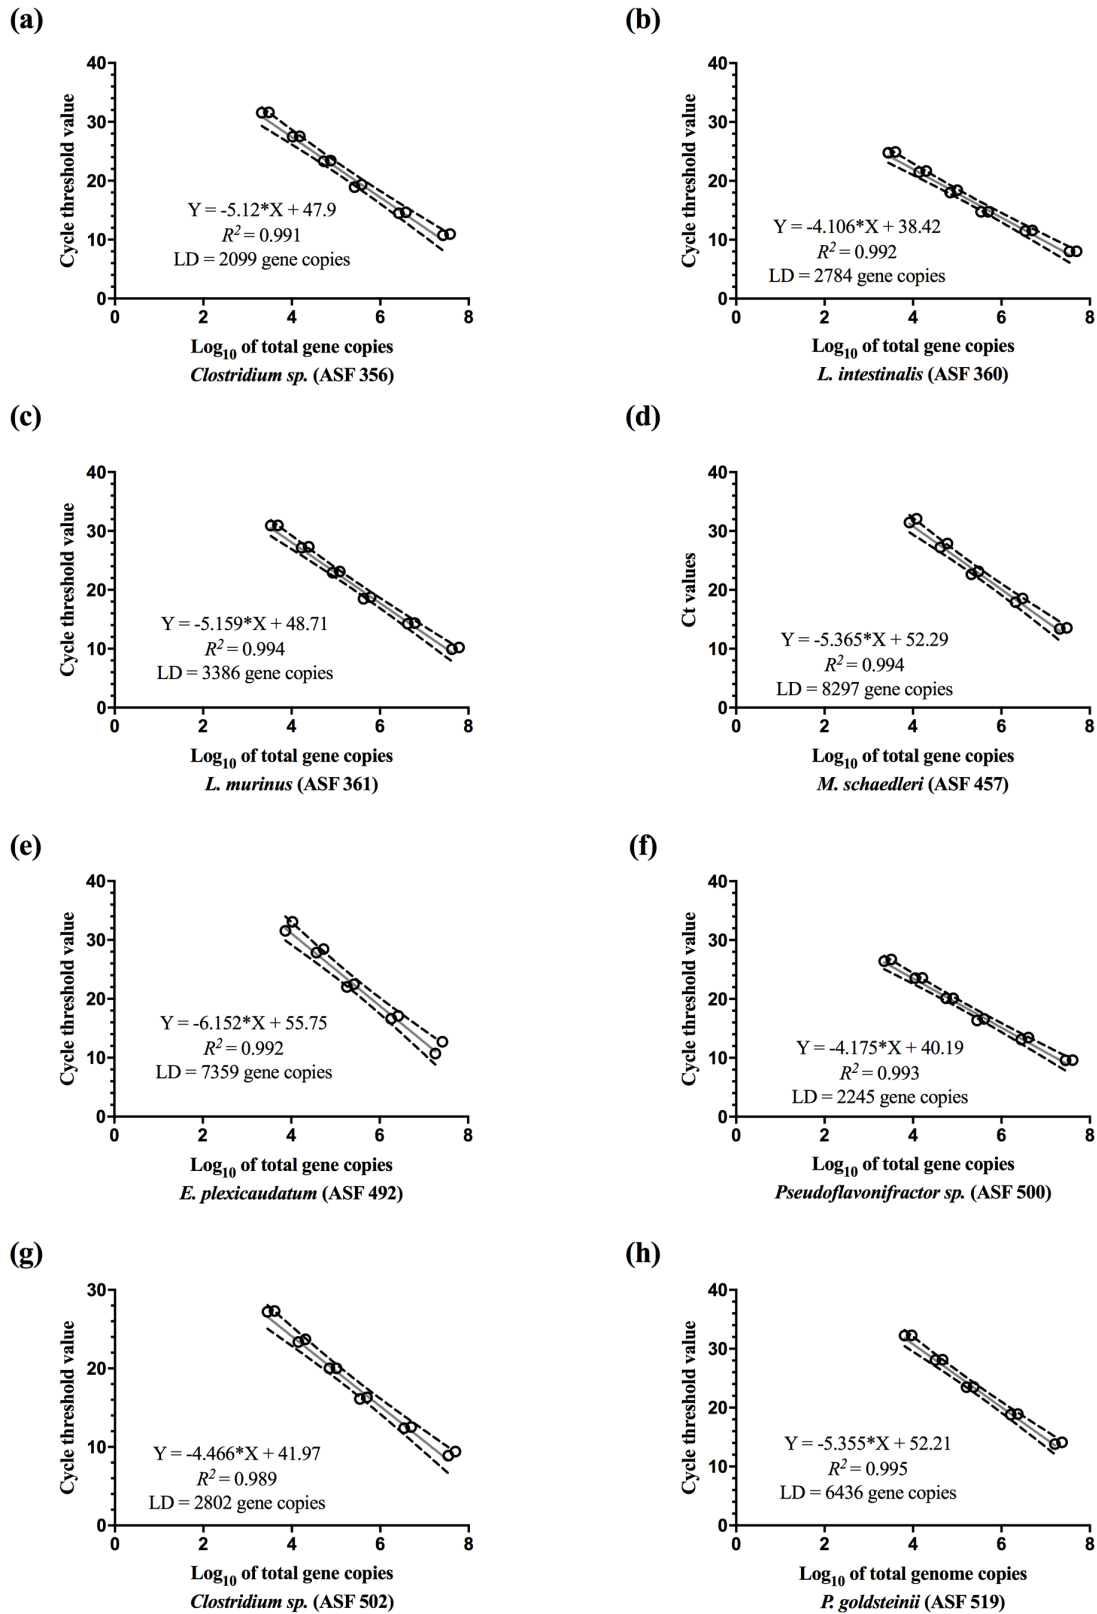

**Fig. S8.** Linear regression model depicting the standard curve parameters for ASF quantification based on plasmid DNA standard curves and the 16S rRNA copy number per ASF taxon using DNA extracted from feces of germ-free mice as a reaction matrix. Standard curves were prepared using ten-fold serial dilutions of purified vector-free plasmid DNA containing the 16S rRNA gene sequence of each ASF bacterium in DNA extracted from the feces of germ-free C3H/HeN and C57BL/6 mice (mixed 1:1 for each genotype) to verify that the reaction matrix (i.e., DNA extracted from feces versus molecular grade water; Fig. S2) did not affect assay performance. The predicted linear model line (gray), estimated equation, R-squared values and limit of detection (LD) are shown for each ASF bacterium based on the  $\log_{10}$  of total of 16S rRNA gene copies. For the calculations, five was used as the final number of 16S rRNA gene copies per ASF bacterial genome. Also shown are the 95% confidence interval bands (black dotted lines) and serial dilution points (open black circles). All reactions were run in duplicate using SYBR Green Master Mix B. Of note, only six serial dilutions were made for each ASF plasmid solution, since the goal of this experiment was to show that the fecal germ-free matrix did not interfere with the overall detection and linearity of the reactions. Therefore, the limit of detection shown here is based on the last dilution point used and not the true limit of detection shown in Fig. S2.

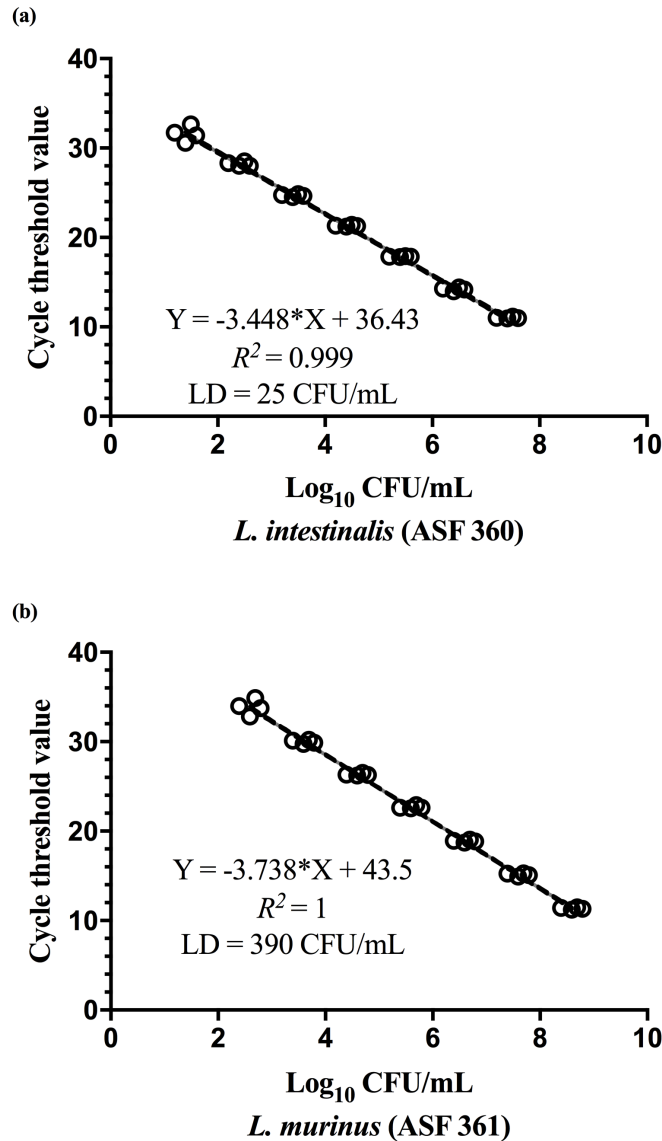

**Fig. S9.** Linear regression model depicting the standard curve parameters for ASF 360 and ASF 361 quantification based on log<sub>10</sub> CFU/mL. Standard curves were prepared using ten-fold serial dilutions of a culture grown in tryptic soy (TS) broth. Purified genomic DNA was then extracted from one mL of each dilution for both ASF 360 and 361. The initial inoculum concentration was determined using a standard serial dilution procedure by plating ten-fold serially diluted samples in triplicate on TS agar plates (ASF 360 = 2.5x10<sup>7</sup> CFU/mL, ASF 361 = 3.9x10<sup>8</sup> CFU/mL). All growth was performed under aerobic conditions at 37°C with no shaking. The graph above depicts the predicted linear model line (gray), estimated equation, R-squared values and limit of detection for each bacterium. Also shown are the 95% confidence interval bands (black dotted lines) and serial dilution points (open black circles). All reactions were run in quadruplicate (i.e., four independent extractions per dilution) using SYBR Green Master Mix B.



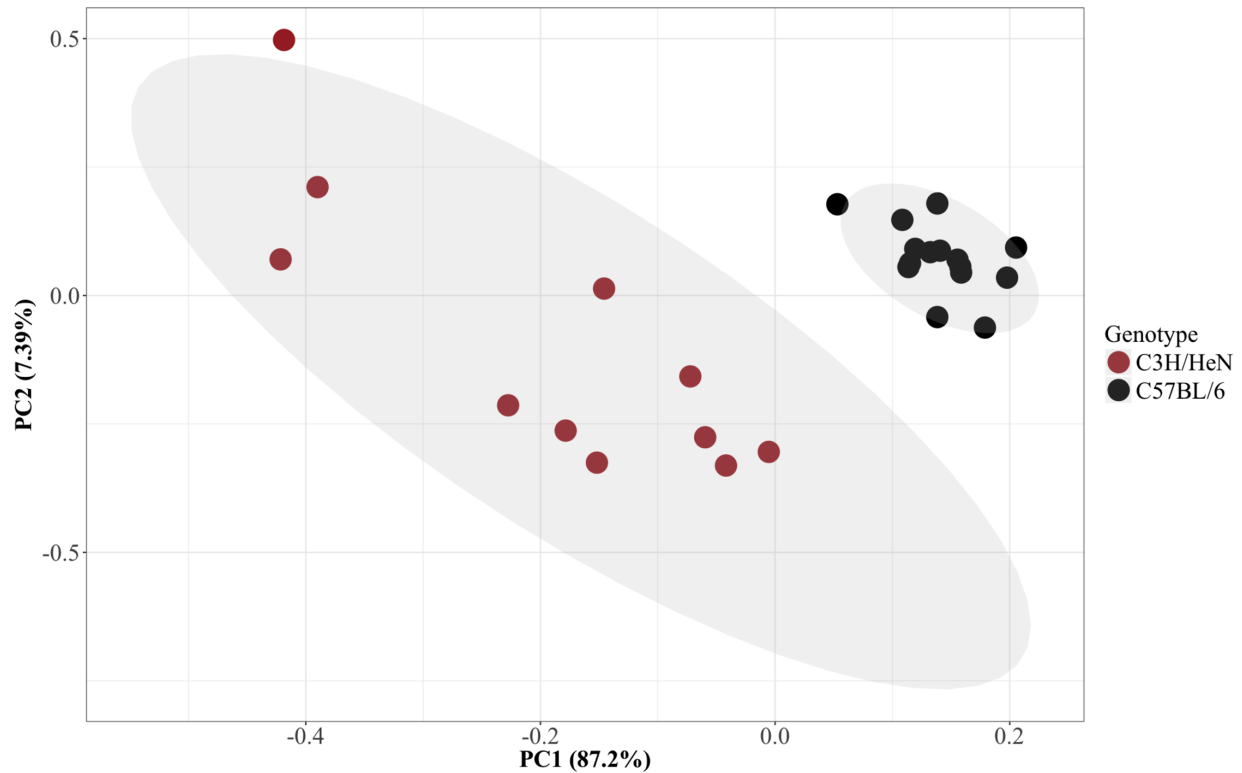

**Fig. S10.** PCA plot depicting how the ASF community clusters when comparing the  $\log_{10}$  of total 16S rRNA gene copies per gram of cecal contents between mouse genotypes (i.e., C3H/HeN in brown and C57BL/6 in black). The x- and y-axes indicate the principal components 1 (PC1) and 2 (PC2) and include the percent of variance explained by each PC. Each dot in the PCA plot represents an individual animal and its respective ASF member abundances. Gray shaded ellipses represent dispersion of the data points within treatments and were calculated based on a multivariate T distribution. All qPCRs were run in duplicate using SYBR Green Master Mix A. Estimated ASF abundances were achieved using the corresponding plasmid standard curve.

A real-time PCR assay for accurate quantification of the individual members of the Altered Schaedler Flora microbiota in gnotobiotic mice, Gomes-Neto et al.

(a)

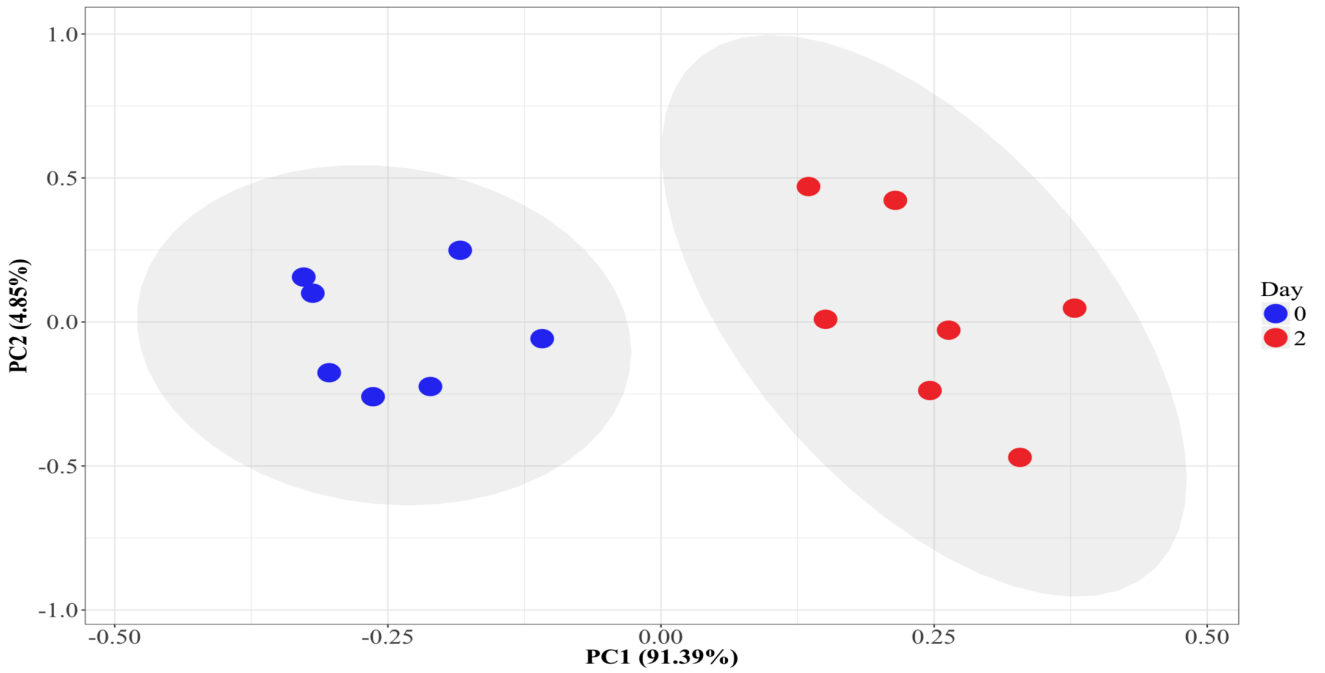

(b)

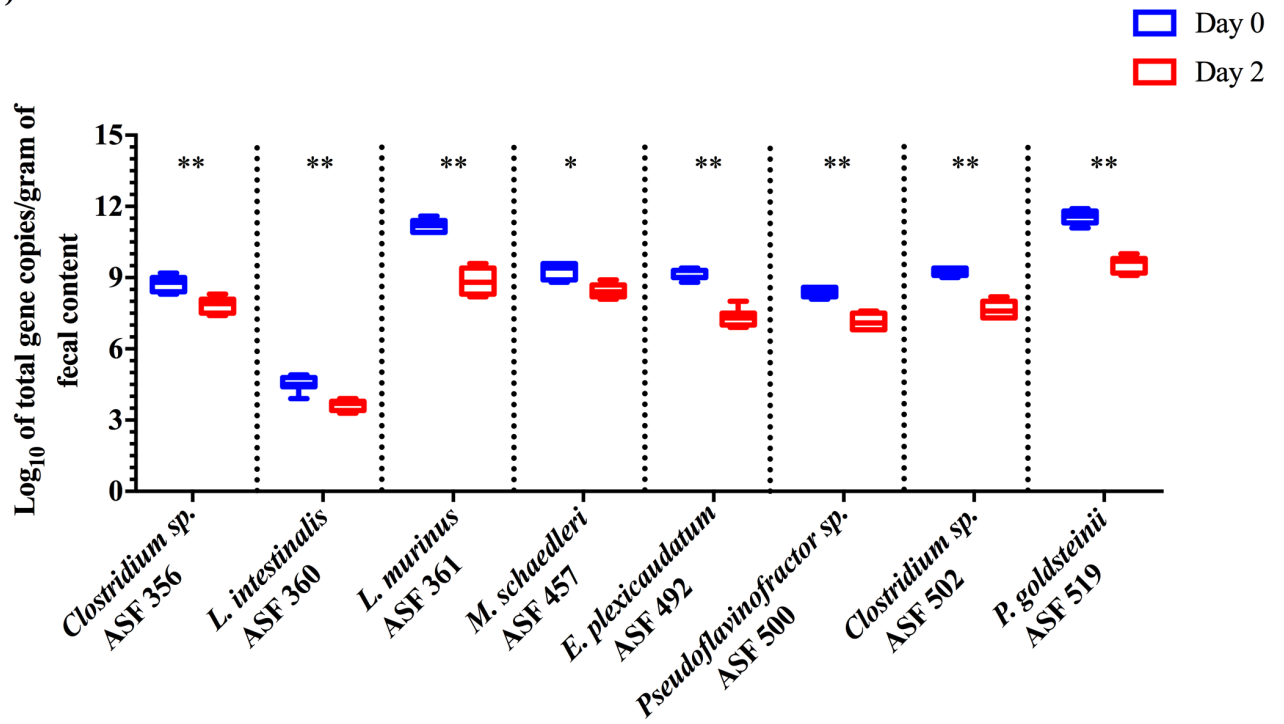

**Fig. S11.** PCA plot depicting how the ASF community clusters when comparing the  $\log_{10}$  of total 16S rRNA gene copies per gram of cecal contents between day 0 and 2 for neomycin treated mice. The x- and y-axes indicate the principal components 1 (PC1) and 2 (PC2), including the percent of variance explained by each PC. Each dot in the PCA plots represents an individual animal with its respective ASF community composition. The gray shaded areas in the plot show the dispersion of the data points within groups and were calculated based on a multivariate T distribution (Panel a). Box-and-whisker plots showing a significant decrease in the individual ASF abundances estimated using the 16S rRNA copy numbers of all bacterial species in the feces of 8 week-old gnotobiotic C57BL/6 mice ( $n = 7$  per group) following treatment with neomycin for two consecutive days (10 mg/mL of drinking water for both antibiotics) (Panel b). The y-axis indicates the ASF taxon  $\log_{10}$  of total 16S rRNA gene copies per gram of fecal content, and the x-axis depicts each ASF member taxonomy and identification number. Whiskers depict the entire range of values (min to max); the horizontal bar in the middle of the box represents the median value. Asterisks refer to the degree of significance for the difference in bacterial 16S rRNA gene copies as determined by the non-parametric Wilcoxon matched-pairs signed rank test using a one-tailed distribution for p-value calculations (\*  $p \leq 0.05$ , \*\*  $p \leq 0.01$ , \*\*\*  $p \leq 0.001$ , and \*\*\*\*  $p \leq 0.0001$ ). All qPCRs were run in duplicate using SYBR Green Master Mix A. Estimated ASF abundances were achieved using the corresponding plasmid standard curve.
